# Supplementary material
Source: Elsevier journal article supplement (https://pdf.beequeen.be/agenda/conferences-passees/mlefevre/mmc6.pdf)
Supplement: mmc6 [file mmc6.pdf]

## A Transmissible RNA Pathway in Honey Bees

## Graphical Abstract

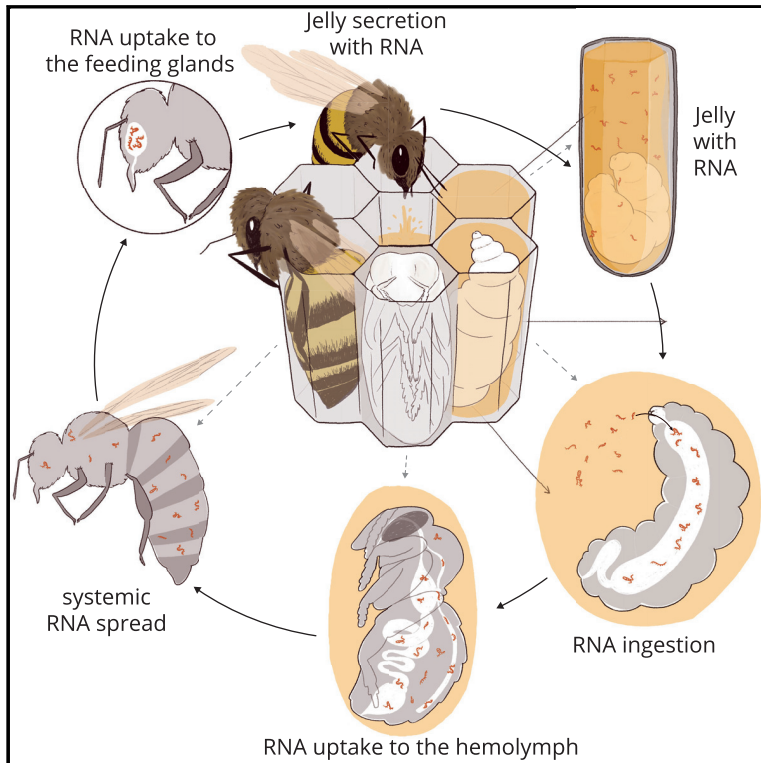

## Authors

Eyal Maori, Yael Garbian, Vered Kunik, ..., Niv Sabath, Ilan Sela, Sharoni Shafir

## Correspondence

eyalmm@gmail.com

## In Brief

RNA mobility among cells has been documented in plants and animals. Maori et al. show that RNA spreads further in honey bees and is horizontally transferred between individuals and across generations. Their findings demonstrate a transmissible RNA pathway with potential roles in social immunity and epigenetic communication between honey bees.

## Highlights

- Ingested dsRNA spreads via hemolymph and is secreted in worker and royal jellies
- Functional dsRNA flows horizontally among honey bees by jelly consumption
- Worker and royal jellies harbor differential natural ssRNA and dsRNA populations
- Diverse pathogenic RNA fragments naturally occur in worker and royal jellies

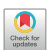

# A Transmissible RNA Pathway in Honey Bees

Eyal Maori,<sup>1,5,7,\*</sup> Yael Garbian,<sup>2,5</sup> Vered Kunik,<sup>3</sup> Rita Mozes-Koch,<sup>2</sup> Osnat Malka,<sup>2</sup> Haim Kalev,<sup>2</sup> Niv Sabath,<sup>4</sup> Ilan Sela,<sup>2,6</sup> and Sharoni Shafir<sup>2</sup>

<sup>1</sup>Department of Veterinary Medicine, University of Cambridge, Madingley Road, Cambridge CB3 0ES, UK

<sup>2</sup>The Hebrew University of Jerusalem, The Robert H. Smith Faculty of Agriculture, Food and Environment, Rehovot 7610001, Israel

<sup>3</sup>Bioinformatics Consulting, 12 Hailanot Street, Gat-Rimon 4992000, Israel

<sup>4</sup>Department of Biochemistry, Rappaport Faculty of Medicine, Technion–Israel Institute of Technology, Haifa 31096, Israel

<sup>5</sup>These authors contributed equally

<sup>6</sup>Deceased

<sup>7</sup>Lead Contact

\*Correspondence: [eyalmm@gmail.com](mailto:eyalmm@gmail.com)

<https://doi.org/10.1016/j.celrep.2019.04.073>

## SUMMARY

Systemic RNAi, initiated by double-stranded RNA (dsRNA) ingestion, has been reported in diverse invertebrates, including honey bees, demonstrating environmental RNA uptake that undermines homologous gene expression. However, the question why any organism would take up RNA from the environment has remained largely unanswered. Here, we report on horizontal RNA flow among honey bees mediated by secretion and ingestion of worker and royal jelly diets. We demonstrate that transmission of jelly-secreted dsRNA to larvae is biologically active and triggers gene knockdown that lasts into adulthood. Worker and royal jellies harbor differential naturally occurring RNA populations. Jelly RNAs corresponded to honey bee protein-coding genes, transposable elements, and non-coding RNA, as well as bacteria, fungi, and viruses. These results reveal an inherent property of honey bees to share RNA among individuals and generations. Our findings suggest a transmissible RNA pathway, playing a role in social immunity and signaling between members of the hive.

## INTRODUCTION

In eukaryotes, sequence-specific gene silencing pathways, generally termed RNA interference (RNAi), are induced and maintained by the presence of dsRNA (Fire et al., 1998). Through processing of base-paired RNA into small RNAs, these mechanisms regulate gene expression in both co-transcriptional and post-transcriptional levels (Bernstein et al., 2001). While RNA-mediated nascent transcript destabilization and heterochromatin remodeling inhibits gene transcription, post-transcriptional gene silencing downregulates gene expression through guiding target RNA degradation or repression of translation (Almeida and Allshire, 2005; Castel and Martienssen, 2013).

RNAi can be divided into cell-autonomous and non-cell autonomous (Whangbo and Hunter, 2008). In cell-autonomous RNAi,

silencing is restricted to cells that produce or were exposed to the dsRNA trigger. Initiation of local RNAi can develop in some organisms into a non-cell autonomous silencing signal, affecting cells and tissues that originally did not generate or were not introduced to dsRNA (Jose and Hunter, 2007; Voinnet and Baulcombe, 1997). The mechanisms that facilitate RNA export from donor cells, extracellular spread, and import into acceptor cells are not fully elucidated, but are under ongoing investigation in diverse biological systems.

In 1998, Timmons and Fire (1998) were the first to report on gene silencing triggered by environmentally acquired dsRNA. In essence, their finding represents a form of horizontal regulatory RNA transfer. To date, susceptibility to environmental RNAi has been established in fungus and animals from different phyla, including Nematodes, Platyhelminthes and Arthropods (Knip et al., 2014). Environmental RNAi experiments mostly involve dsRNA ingestion, suggesting that dietary consumption is an effective RNA uptake pathway. Further supporting this, potent RNAi transmission from transgenic dsRNA-expressing plants to invertebrate herbivores has been widely reported (Mao et al., 2007; Zhang et al., 2015). Accordingly, host-to-parasite RNAi transfer (commonly termed “host-induced gene silencing” [HIGS]) has been applied to agriculture in recent years, demonstrating a potential practical strategy to control various viral and pest-related diseases (Garbian et al., 2012; Zotti et al., 2018).

One of the main questions in the field of environmental RNAi is whether natural and functional RNA transfer among organisms occurs. Recently, transmission of parasitic nematode-derived miRNA to its mammalian host has been shown to compromise immunity of infected mice (Buck et al., 2014). Similarly, pathogenic fungi exploit mobile small RNA signals to modulate plant immune responses via RNAi (Weiberg et al., 2013). Reciprocally, *Arabidopsis* plants secrete and transfer vesicles containing small RNAs that could suppress virulence fungal genes (Cai et al., 2018). Furthermore, ingestion of pollen-derived plant miRNA induces worker bee sterility in a sequence-specific manner (Zhu et al., 2017). Interestingly, while the aforementioned examples provide evidence that some organisms acquire, and are affected by foreign regulatory RNA, it is still puzzling why would they allow so? This evolutionarily maintained susceptibility to non-self-regulatory RNA is intriguing in light of the fact that the most well-known transmissible RNA are viruses.

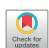

One of the remarkable characteristics of honey bees is their environmentally mediated phenotypic plasticity (Winston, 1991). Female bee larvae can either develop into worker or queen; two castes with distinct morphology, physiology, reproductive capability, lifespan, and behavior. This developmental flexibility of genetically identical individuals is driven by differential diet consumption. A larva fed exclusively on royal jelly will develop into a queen, whereas larva fed on worker jelly will develop into a worker (Haydak, 1970). In other words, nutritional differences trigger one genome to direct two distinct phenotypic outputs in honey bees.

Epigenetic regulation has been shown to play a role in the honey bee's caste differentiation (Kucharski et al., 2008). Consistently, the methylation imprint varies between the brain's DNA of workers and queens, demonstrating unique epigenetic profiles among workers and queens (Lyko et al., 2010). Nonetheless, although the general involvement of epigenetics has been established, it is still not clear how caste-specific DNA methylation marking is directed.

Previously, we reported on an RNAi-based ingestion system for the control of Israeli Acute Paralysis Virus (IAPV) disease in honey bees (Maori et al., 2009). Field trials, in which this environmental RNAi system was employed, indicated that the colony performance of virus-inoculated hives deteriorated following virus infection in control hives, whereas that of dsRNA-treated hives remained strong (Hunter et al., 2010). Interestingly, dsRNA-treated hives also produced more honey, when the main honey flow was 3–4 months after the last dsRNA treatment. By that time, most of the originally treated bees would have been replaced by new generations. Honey bee viruses can be transmitted among individuals in the hive both horizontally and vertically (Chen and Siede, 2007). It was therefore expected that hives would become virus-affected once the new generation gradually replaced the previous, dsRNA-treated one. Potential persistence of disease protection raised the question of whether treated honey bees may serve as vectors for RNA.

Following this hypothesis, here we show that environmentally consumed dsRNA in honey bees is up-taken from the digestive system and systemically spread through the hemolymph associated with a protein complex. Then, these RNAi carrier bees transfer silencing-triggering molecules to the next generation via dsRNA secretion into the jelly. We demonstrate that jelly-secreted dsRNA is biologically active and triggers a long-lasting silencing effect in the recipient generation. Finally, we characterize diverse naturally occurring endogenous and exogenous RNA populations in royal and worker jellies. These findings demonstrate an environmentally mediated transmissible RNA in honey bees.

## RESULTS

### Intake of Ingested dsRNA into the Honey Bee Hemolymph

Adult honey bees exchange food via trophallaxis, and all bees in a hive are regarded as having a “shared stomach” (Winston, 1991). Consumed but pre-digested dsRNA may thus be distributed directly among adult bees. However, nurse honey bees nourish the young larvae with a processed diet secreted from the mandibular and hypopharyngeal food glands, the worker

and royal jellies (Wright et al., 2018). In order to transmit RNAi-triggering molecules to the next generation, the ingested dsRNA has to spread systemically and reach the food glands, and then be secreted in the jellies. Therefore, we first attempted to test whether ingested dsRNA occurs in the honey bee's circulatory system, where it can systemically spread. To that end, we applied digoxigenin (DIG)-labeled dsRNA (dsRNA\*) for the direct detection of ingested dsRNA.

Adult worker bees were immobilized and fed on dsRNA\* or mock solutions directly to their glossa in order to avoid cuticle contamination. Five hours post feeding, we extracted hemolymph of bees and tested for the presence of dsRNA\* in whole raw hemolymph extracts. A labeled band corresponding to the purified dsRNA\* size (430 bp) was detected in the hemolymph of treated bees (Figure 1A), demonstrating up-take of full-length dsRNA from the digestive system to the circulatory system.

Interestingly, two additional dsRNA\* bands of higher molecular weight (corresponding approximately to 2.5 and 4 Kbp) were also observed in raw hemolymph extracts (Figure 1A). Two scenarios can be drawn to explain the appearance of high molecular weight labeled RNAs: (1) recombination between dsRNA\* and other RNAs or (2) association of the dsRNA\* with other components of the hemolymph. Following Proteinase K digestion of the hemolymph extract, the size of the higher bands shifted back to the expected 430 bp, indicating that the higher compounds were complexes of circa full-length dsRNA and hemolymph protein(s) (Figure 1B). Consistent with a previous report (Garbian et al., 2012), no processed dsRNA forms could be detected in the hemolymph extracts tested.

### Presence of Ingested dsRNA in the Worker and Royal Jelly

The finding of ingested dsRNA-protein complexes in the hemolymph indicates a possible active mechanism for uptake and translocation of dsRNA through the honey bee's circulatory system and possible spread to the jelly-producing glands. If this happens, mobile dsRNA may be present in the jelly. Therefore, we next tested whether ingested dsRNA is secreted in the diet of worker- and queen-destined larvae.

Mini hives with circa 250 worker bees and reproductive queens were established and fed on sucrose only (control) or sucrose solution mixed with dsRNA carrying a foreign GFP sequence (dsRNA-GFP). Worker jelly was collected from brood cells containing 5<sup>th</sup> instar worker larvae and royal jelly was harvested from queen brood cells with 3<sup>rd</sup>–4<sup>th</sup> instar larvae (see STAR Methods). We could detect the presence of dsRNA-GFP by northern blot analysis performed on total RNA extracted from worker and royal jellies. Notably, while the full-length dsRNA could be detected, additional degraded or processed GFP-RNA forms appeared in both jellies (Figure 1C).

### RNA Is Horizontally Transferred among Bee Generations

The presence of ingested dsRNA in the circulatory system indicates systemic spread and the possibility of dsRNA transport to the food glands (Figures 1A and 1B). This was further supported by dsRNA presence in both worker and royal jellies (Figure 1C). Hence, dsRNA could presumably be transmitted from nurse bees to the young larvae through jelly consumption. In

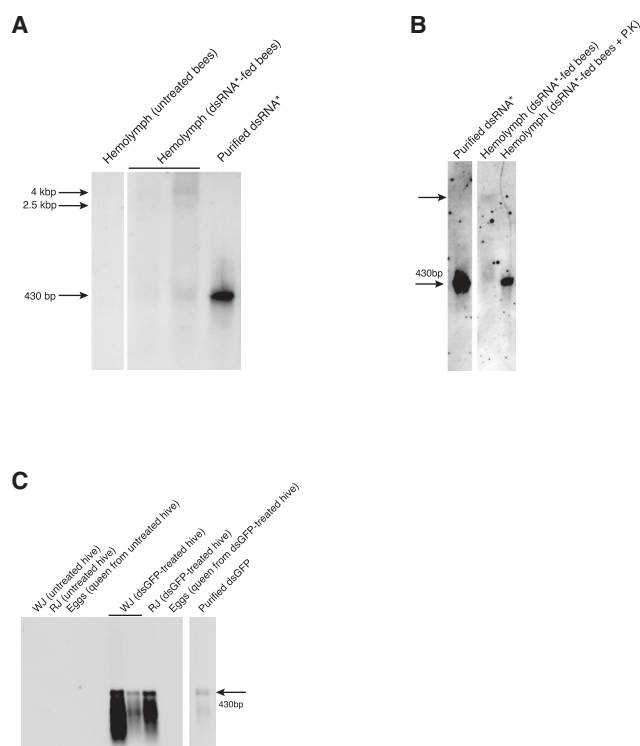

**Figure 1. Presence of Ingested dsRNA in the Honey Bee Hemolymph and Secretion into Worker and Royal Jellies**

(A) Presence of ingested dsRNA in the hemolymph. Probe-free northern blot analysis performed on pooled raw hemolymph extracts (10  $\mu$ l per well). Raw hemolymph extracts were collected from bees that were fed on 50% sucrose solution (w/w) containing DIG-labeled dsRNA-GFP or sucrose solution only. The 430-bp band represents free full-length dsRNA. Multiple lanes with a single label represent independent biological replicates.

(B) Association of ingested dsRNA with a protein complex in the hemolymph. Probe-free northern blot analysis performed on untreated or protease K-treated pooled raw hemolymph extracts (10  $\mu$ l per well). The hemolymph in both treatments was derived from the same hemolymph sample.

(C) Occurrence of ingested dsRNA in the larval diets and newly laid eggs from dsRNA-GFP treated and untreated mini hive. Northern blot analysis of 1  $\mu$ g total RNA extracted from worker jelly (WJ), royal jelly (RJ), and eggs. Eggs were laid in untreated mini hives by queens that were transferred from dsRNA-treated or untreated mini hives. Purified dsRNA-GFP was used as a positive control and a size marker for full-length dsRNA.

order to test whether RNA can be transferred horizontally among bee generations down the line, we established reproductive mini hives that were fed on sucrose solution (control hives) or sucrose solution containing dsRNA-GFP. During the experiment, adult workers, larvae, pupae, and newly emerged bees were collected and analyzed for the presence of dsRNA-GFP (Figure 2A). An RNA slot-blot assay with a GFP-specific probe was conducted and showed, as expected, the presence of dsRNA-GFP in adult workers that had been consuming directly dsRNA in their diet. It also demonstrated the occurrence of dsRNA-GFP in larvae that had been consuming jelly secreted by treated bees (Figure 2B). As previously reported, dsRNA is stable and persists in treated adult bees for a few days post feeding (Maori et al., 2009). Here, we show that dsRNA, which is transmitted from nurse

bees to the larvae, persists in subsequent developmental stages including pupae and newly emerging bees. It appears that ingested foreign dsRNA diminished with time but could be detected at least 14 days after the last dsRNA feed (Figure 2B).

While the presence of dsRNA-GFP in the jellies supports horizontal transfer to the progeny, it could also be explained by vertical dsRNA transmission from queen to egg. To distinguish between the two possible transmission routes, we designed an experiment in which only horizontal nurse-bee-to-larvae transmission could occur (Figure 2C). A similar mini hive set up was established, and sucrose solution containing dsRNA-GFP or sucrose solution only (control hives) was provided for five days. On day six, combs containing 1<sup>st</sup> instar larvae from control hives were transferred either to a dsRNA-treated hive or to another control hive. The transferred larvae were then allowed to develop four additional days in the new untreated or dsRNA-treated host colonies. On day ten, the 5<sup>th</sup> instar larvae were collected from the transferred combs, washed rigorously, and analyzed for the presence of dsRNA-GFP. Northern blot analysis performed on total RNA detected a GFP-RNA signal in larvae that were nourished by dsRNA-treated bees. Consistent with the dsRNA-GFP signal in jellies (Figure 1C), degraded or processed GFP-RNA forms are detected in recipient larvae (Figure 2D). All together, these data demonstrate an environmentally mediated horizontal RNA transfer route among honey bee generations.

RNA transfer from nurse bee to larvae does not rule out maternal queen deposition of RNA to eggs and its persistence throughout the progeny development. Therefore, we attempted exploring whether vertical dsRNA transmission also occurs in honey bees (Figure 2E). To this end, the reproductive mini hive system was applied and dsRNA-GFP-containing sucrose solution or sucrose-only solution (control hive) was provided for six days. On day six, simultaneous queen swaps among treatments were performed as follows: (1) the queen from dsRNA-GFP hive replaced the queen from a control hive, and (2) the substituted control queen replaced a queen from a different control hive. On day eight, after two days of acclimatization, the newly introduced queens were released and allowed to lay eggs in their new colony. On day ten, eggs were collected, pooled, and analyzed for the presence of dsRNA-GFP. We could not detect GFP-RNA signal in eggs laid by a queen that was previously nourished with royal jelly provided by dsRNA-treated bees (Figure 1C). We acknowledge that such negative detection could be explained by the sensitivity limitation of the northern blot assay. Thus, we conclude that, while vertical transmission from queen to larvae might occur to some extent, horizontal nurse-to-larvae transfer is the main route that RNA flows among generations and members of the hive.

### Transmissible RNA is Biologically Active in Recipient Bees

We next asked whether horizontally transferred RNA (i.e., transmissible RNA) is biologically active within recipient individuals. It has been previously demonstrated that supplementing dsRNA into the natural larval diet induces potent RNAi against endogenous RNA (Guo et al., 2013; Nunes and Simões, 2009). Moreover, similar application with dsRNA, corresponding to deformed wing virus (DWV) and sacbrood virus (SBV), effectively reduced viral

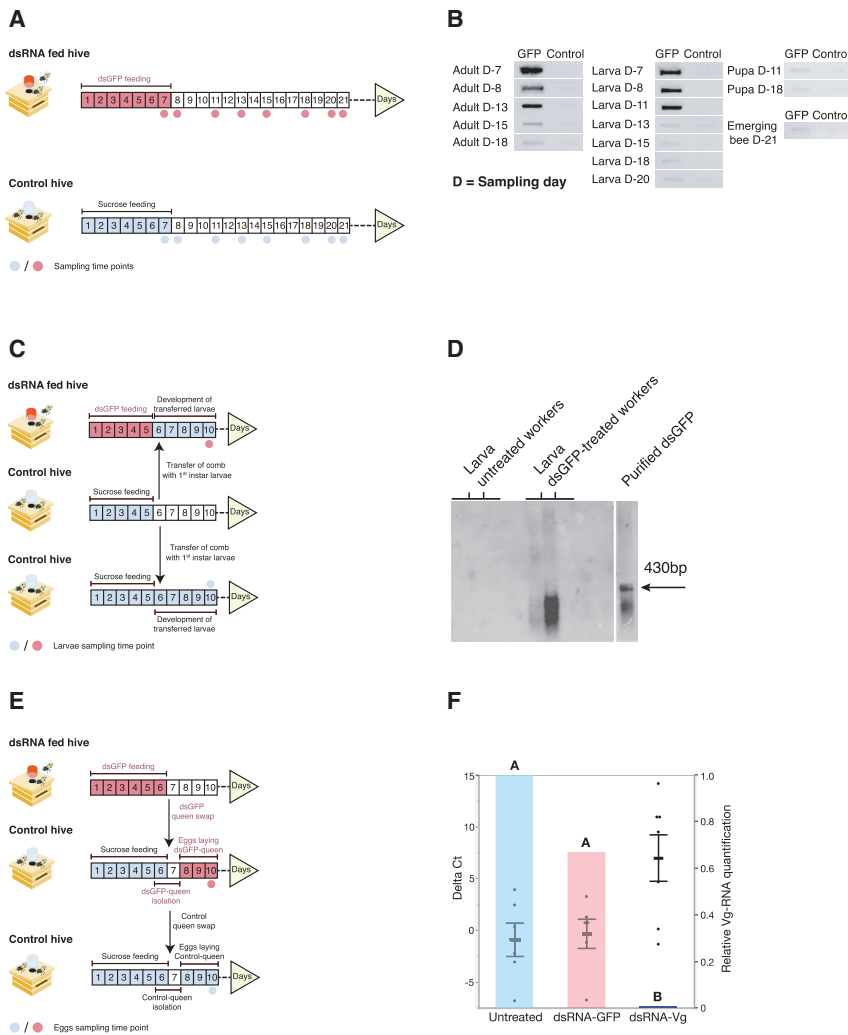

**Figure 2. Biologically Active dsRNA Is Horizontally Transferred among Bee Generations**

(A) Experimental design for detecting RNA transmission within the hive. Reproductive mini hives contained circa 250 adult bees and brood at different developmental stages and an active queen. Treated colonies were provided with 300 µg dsRNA-GFP in 50% sucrose solution (w/w) per feeding. Control mini hives were fed on 50% sucrose solution (w/w) only. Adult bees, 2<sup>nd</sup>-3<sup>rd</sup> instar larvae and pupae were sampled from the available developmental stages at each time point.

(B) Occurrence of dsRNA in adult bees and its transfer to the next generation. RNA slot-blot analysis of 1.5 µg total RNA extracted from individual larvae, pupae, and adult bees from dsRNA-GFP treated or untreated colonies (Figure 2A).

(C) Experimental design to test horizontal RNA transfer among bees. Reproductive mini hives contained circa 250 bees and an active queen. Treated colonies were provided with 200 µg dsRNA-GFP in 50% sucrose solution (w/w) per feeding. Control mini hives were fed on 50% sucrose solution (w/w) only.

(D) Transfer of dsRNA from worker bees to nourished larvae. 1<sup>st</sup> instar larvae were transferred from untreated hive and nourished by workers from dsRNA treated or untreated mini hives for four days. Northern blot of 5 µg total RNA extracted from individual 5<sup>th</sup> instar larvae.

(E) Experimental design to test vertical RNA transfer among bees. Reproductive mini hives contained circa 250 bees and an active queen. Treated colonies were provided with 200 µg dsRNA-GFP in 50% sucrose solution (w/w) per feeding. Control mini hives were fed on 50% sucrose solution (w/w) only. Queens from dsRNA treated or untreated mini hives were removed to untreated mini hives. The queens were then isolated for two days to acclimatize. Next, the queens were released and their newly laid eggs were collected.

(F) Transmissible RNA is biologically active. Vitellogenin (Vg) knockdown in ten-day-old workers that were nourished as larvae by dsRNA-Vg treated bees. Vg expression was quantified by RT-qPCR. Individual workers were tested in the untreated (N = 6), dsRNA-GFP (N = 6), and dsRNA-Vg (N = 7) treatments. Left y axis corresponds to ΔCt values; individual bee values are shown as dark circles; mean value as dark rectangle; and error bars representing standard error of the mean. Right y axis corresponds to Vg-RNA quantification relative to the untreated, and mean values are shown as colored bars. Different letters above the bars indicate statistically significant difference between treatments according to the Tukey-Kramer (HSD) test (p < 0.05). Higher ΔCt values indicate lower RNA quantification.

RNA titer as well as disease symptoms in infected worker larvae and adults (Desai et al., 2012; Liu et al., 2010). Notably, these studies showed that ingestion of jelly-containing dsRNA results in sustainable gene silencing that lasts until adulthood (Desai et al., 2012; Guo et al., 2013; Nunes and Simões, 2009).

Unlike previous reports, we examined whether dsRNA, which is originated from nurse bees and secreted into the jelly, could elicit RNAi response in the progeny. To answer this question, we established a minimal hive system in plastic boxes containing circa 150 workers and a comb with eggs and young larvae. The adult bees were fed for eight days on sucrose solution (untreated), sucrose solution mixed with dsRNA-GFP (non-specific dsRNA control), or dsRNA that matched the vitellogenin mRNA sequence (dsRNA-Vg). When the brood cells were sealed, the adult bees were removed and the combs were kept until new

workers emerged. We then collected ten-day-old workers and analyzed the expression levels of vitellogenin by RT-qPCR. Consistent with persistence of jelly-transmitted dsRNA (Figure 2B) and in agreement with the aforementioned reports (Desai et al., 2012; Guo et al., 2013; Nunes and Simões, 2009), we observed vitellogenin knockdown in adult workers that were nourished as larvae by dsRNA-fed nurse bees (ANOVA:  $F_{2,16} = 5.91$ ,  $p = 0.012$ ; Figure 2F). Five out of seven bees from the dsRNA-Vg treatment had the highest delta CT (ΔCT) values, higher than any of the 12 bees in the controls ( $p = 0.023$  by the conservative non-parametric Wilcoxon test). An ANOVA comparing the dsRNA-Vg treatment with the two controls combined yields  $F_{1,17} = 12.47$ ,  $p = 0.0026$ . Therefore, we concluded that transmissible RNA, at least in a dsRNA form, is biologically active in recipient bees.

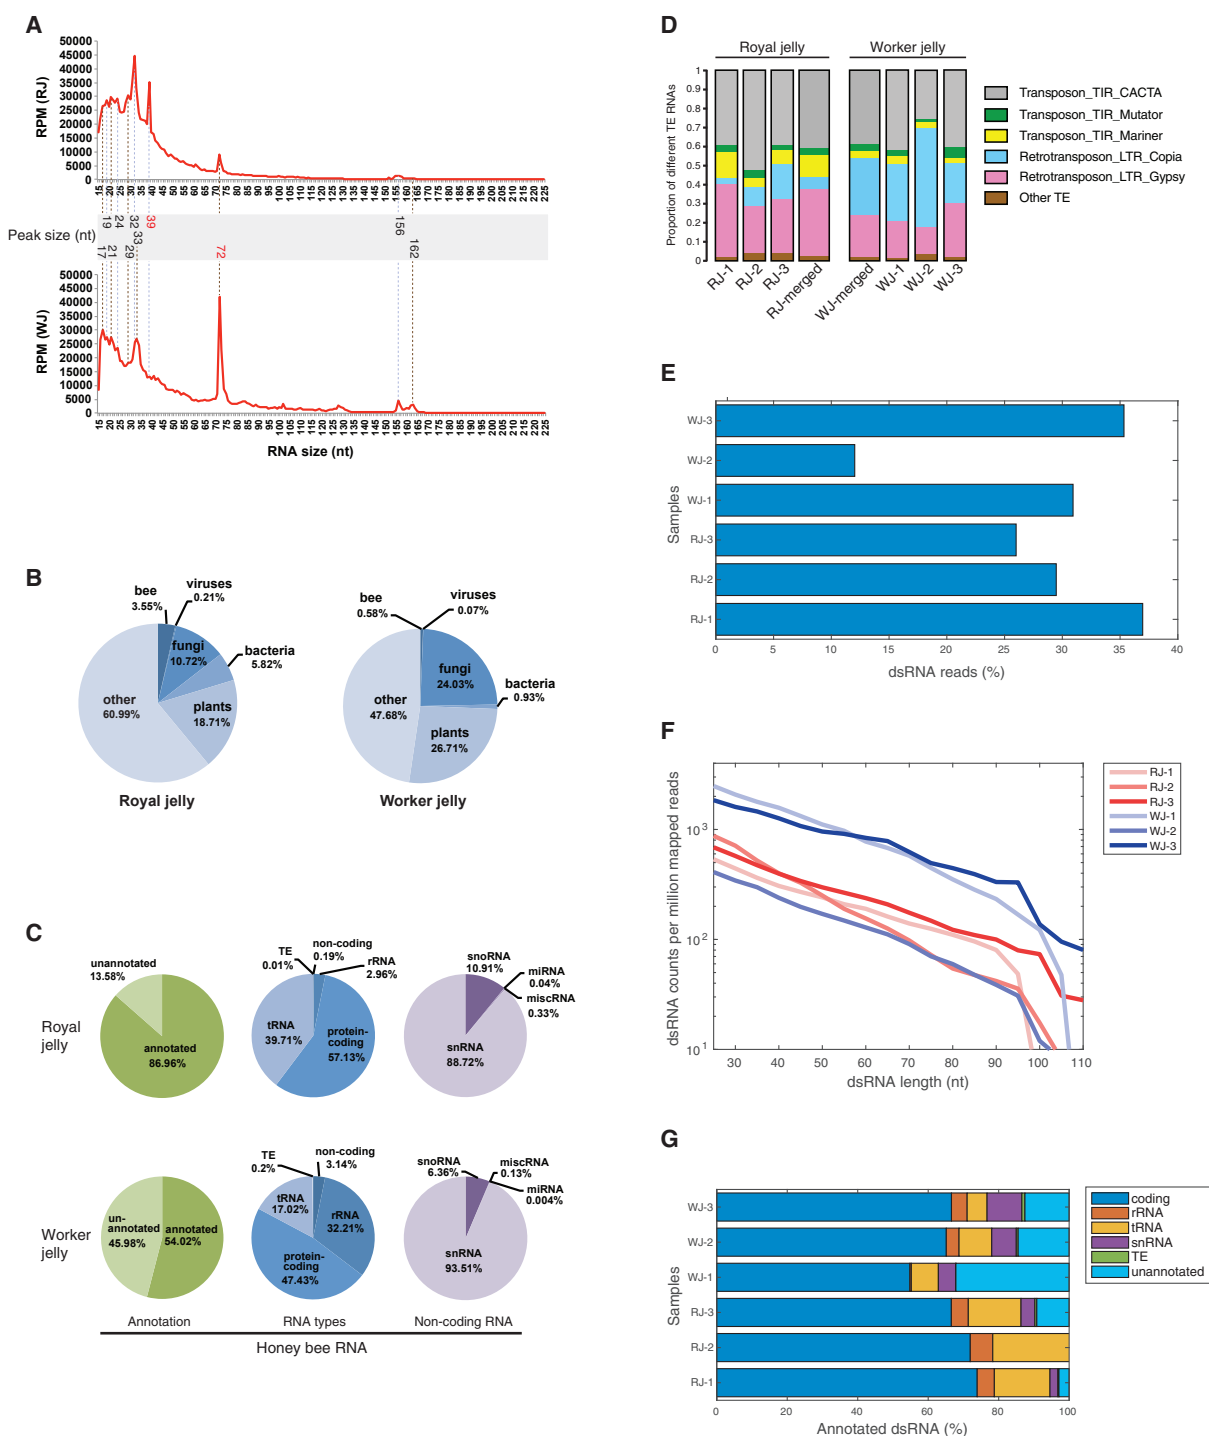

**Figure 3. Differential Naturally Occurring RNA Populations in Worker and Royal Jellies**

(A) Size distribution of naturally occurring royal and worker jelly RNA. RNA size was determined through sequencing full-length jelly RNA by a small RNA-seq protocol that was adapted to sequence broad full RNA length spectrum (i.e., 15–200 nt). Data represent a merged analysis of three biological repeats per jelly and are presented as the normalized number of reads per million (RPM). Common peak sizes are marked in black font, and differential sizes in red font.

(B) RNA-based metagenomic analysis of royal and worker jellies. Data represent a merge analysis of three biological repeats per jelly.

(C) Classification of honey bee (*Apis mellifera*) RNA in royal and worker jellies. RNA types classification derived from annotated sequences in worker and royal jellies (54.02% and 86.96%, respectively). Non-coding RNA classification derived from the RNA types analysis of worker and royal jellies (3.14% and 0.19%, respectively).

(legend continued on next page)

### Naturally Occurring RNA in Worker and Royal Jellies

The previous experiments described a mechanism that enables, through jelly secretion and consumption, transmission of biologically active RNA among individuals within and between generations in the hive. These findings suggest a naturally occurring transmissible RNA in honey bees. In line with this hypothesis, it has been reported that both worker and royal jellies contain small honey bee RNA populations, demonstrating endogenous bee RNA secretion into the larval diet (Guo et al., 2013; Zhu et al., 2017). To further explore the RNA repertoire in the jellies, including the natural occurrence of exogenous and pathogen-related RNA, we adapted a small RNA-seq protocol to sequence full-length RNA up to 200 nt (see STAR Methods). Samples of royal jelly were collected from 3<sup>rd</sup> instar queen larvae brood cells, and worker jelly was collected from 5<sup>th</sup> instar worker larvae brood cells. The jellies were harvested from untreated healthy-looking hives.

Size distribution analysis of sequenced full-length RNA indicated that worker and royal jellies have different profiles, with RNAs corresponding to 39 and 72 nt mainly differentiating between the two jellies (Figures 3A and S1A). We next applied a metagenomics analysis to identify the origin of jelly RNA and, again, found different profiles in the worker and royal jellies (Figures 3B and S1B; Table S1). Surprisingly, bee RNA represents only a minor fraction in both jellies, representing 0.58% and 3.55% of worker and royal jelly, respectively. Instead, large proportions of plant, fungi, and bacteria were identified alongside sequences originating from unknown sources. Remarkably, RNA fragments corresponding to various exogenous bee-affecting viruses could also be detected in both jellies.

We next further characterized jelly RNA that corresponds to the honey bee genome (Figures 3C and S1C–S1E; Table S2). Like the previous jelly RNA analyses, different honey bee RNA profiles were detected in worker and royal jellies. In both jellies, the large proportions represent bee RNA derived from protein coding genes followed by tRNAs. However, worker jelly is relatively enriched in ribosomal, transposable elements (TE) and non-coding RNA. Interestingly, differential TE RNA occurrence could be detected among the jellies, which is mainly associated with LTR-retrotransposons and TIR transposons (Figure 3D).

Previous experiments and other reports demonstrated that ingestion of jelly-containing dsRNA downregulates specific gene expression in recipient larva and adult honey bees. Therefore, we next screened for duplexed honey bee RNA in worker and royal jellies. We found substantial proportions of putative endogenous dsRNA, ranging from 12% to 37% of total honey bee jelly RNA (Figure 3E). The putative dsRNA fragments have a broad size distribution and are mainly derived from protein-

coding genes but also from tRNAs, rRNA, TEs, and un-annotated DNA (Figures 3F and 3G; Table S3). Notably, royal jelly contained higher proportion of bi-directional RNA fragments derived from tRNA genes.

We hypothesized that bees treated with an IAPV-specific dsRNA in previous field trials (Hunter et al., 2010) may have transmitted the antiviral RNA to other bees, resulting in transmissible protection against the viral infection. Therefore, we also characterized the viral RNA in worker and royal jellies.

Overall, RNA corresponding to ten and four bee-affecting viruses could be detected in royal and worker jelly, respectively (Figures 4A and 4B; Table S4). The most abundant viruses in both jellies were DWV and Varroa destructor virus 1 (VDV-1). Both sense and antisense viral RNA strands are detected for most viruses. The presence of replicative forms (anti-sense viral genome) suggests an intracellular origin of the viral RNA and its secretion into the jelly rather than RNA derived exclusively from environmental capsids. Additionally, we analyzed the size distribution of viral sequences and identified diverse sense and antisense viral RNA fragments in both jellies (Figures 4C and 4D). Interestingly, while both worker and royal jellies contain large populations of small RNAs (Figures 3A and S1A), almost no small viral RNAs (20–25 nt) were identified (Figures 4C and 4D). To assess fragment diversity as well as potential occurrence of base-paired viral RNA, reads were mapped against corresponding viral genomes (Figures 4E, 4F, and S2). Multiple mappings were observed in most viruses, especially in the abundant VDV-1 and DWV. Remarkably, presence of long (>25 nt) overlapping viral sense and antisense RNA fragments is somewhat common, suggesting naturally occurring viral dsRNA in worker and royal jellies (Figures 4E, 4F, and S2).

## DISCUSSION

Employing dsRNA as a model, this study reports on an environmentally mediated RNA cycle among honey bees. The cycle is engaged by consumption of RNA-containing diet by an individual bee. Then, the ingested RNA is spread from the digestive system through the gut cells to the hemolymph, where it is associated with a protein complex. A systemic RNA signal reaches the food secretion glands of nurse bees and is transmitted to the progeny, again, through RNA-containing jelly consumption (Figure 5). This phenomenon is driven by horizontal RNA transfer among individual bees and across generations. Hence, it demonstrates an inherent non-organism autonomous RNA—a transmissible RNA route in honey bees. Such a route could involve transmission of diverse exogenous and endogenous RNA types, including double- and single-stranded RNA corresponding to protein-coding and non-coding genes.

(D) Occurrence of honey bee transposable elements RNA in royal and worker jellies. TE classification derived from RNA types analysis of worker and royal jellies (0.2% and 0.01%, respectively)

(E) Detection and proportion of putative endogenous (*Apis mellifera*) dsRNA in worker and royal jelly samples. DsRNA is detected when two distinct RNA molecules had at least 25-nt base pairs, and the overhang on either side did not exceed 100 nt.

(F) Size distribution of putative worker and royal jelly dsRNAs that are mapped to the *Apis mellifera* genome.

(G) Worker and royal jelly contain diverse putative endogenous dsRNAs derived from un-annotated, protein-coding and non-coding honey bee genes. Data in (A), (B), and (C) represent a merge analysis of three biological repeats per jelly.

See also Figure S1 and Tables S1, S2 and S3.

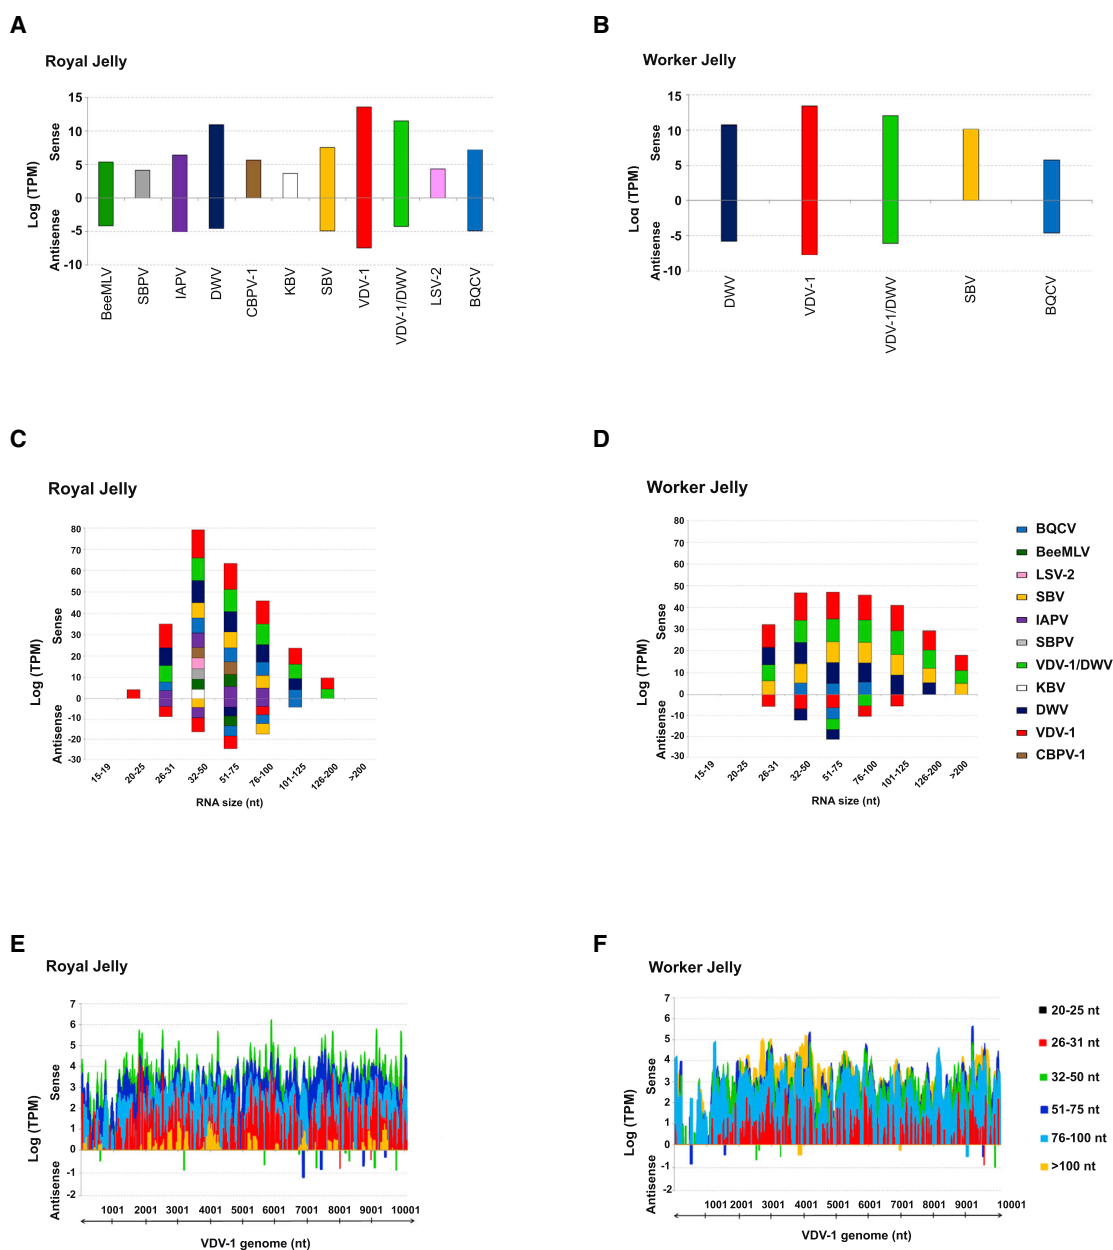

**Figure 4. Diverse Viral RNA Fragments Naturally Occur in Royal and Worker Jellies**

- (A) Occurrence of diverse viral RNAs in royal jelly.  
 (B) Occurrence of diverse viral RNAs in worker jelly.  
 (C) The viral RNA in royal jelly is fragmented.  
 (D) The viral RNA in worker jelly is fragmented.  
 (E) Genome distribution of VDV-1 RNA fragments from royal jelly.  
 (F) Genome distribution of VDV-1 RNA fragments from worker jelly.

Three biological samples were individually sequenced per jelly; sequencing outcomes were merged and analyzed. Data are presented as the number of reads normalized to log transcripts per kilobase million (TPM).

See also [Figure S2](#) and [Table S4](#).

Larva and adult honey bees can ingest biologically active dsRNA ([Maori et al., 2009](#); [Nunes and Simões, 2009](#)). However, the ability of bees to efficiently take up dietary small RNAs (e.g., miRNAs and siRNAs) is currently debatable ([Chen et al., 2014](#);

[Guo et al., 2013](#); [Masood et al., 2016](#); [Zhu et al., 2017](#)). While exchange of dietary RNA among adult bees can reasonably occur via trophallaxis ([LeBoeuf et al., 2016](#)), in our experiments, secretion of jelly that contained dsRNA-GFP required systemic



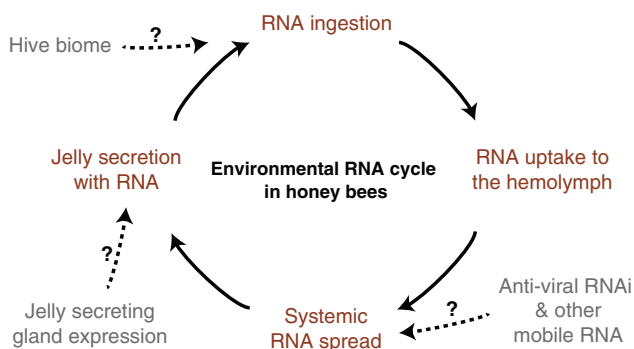

**Figure 5. Working Model for Transmissible RNA Pathway in Honey Bees**

Bees are able to take up RNA from the environment through ingestion. The ingested RNA is taken up from the digestive system through the gut cells to the circulatory system, the hemolymph. In the hemolymph, ingested extracellular RNA is associated with a protein complex and systemically spread, including to the jelly-producing hypopharyngeal and mandibular glands. Then, ingested and other RNAs are secreted in the royal and worker jellies. A new environmental RNA cycle is initiated through ingestion of jelly-containing RNA. A few potential RNA sources could participate in the transmissible RNA pathway including systemic antiviral RNAi and endogenous mobile RNA, jelly-secreting gland transcription as well as environmental hive RNA (e.g., plant, fungi, and bacteria).

distribution of the environmentally consumed dsRNA within the nurse bee. A few RNA uptake mechanisms have been reported including internalization by extracellular vesicles, dsRNA channels, and receptor-mediated endocytosis (Feinberg and Hunter, 2003; McEwan et al., 2012; Saleh et al., 2006; Valadi et al., 2007). Although these mechanisms have demonstrated cellular RNA import, little is known about the systemic spread of RNA through the insect's circulatory system. Here, we show that ingested-dsRNA is exported into the bee's hemolymph where at least part of it is not naked, but associated with proteins, forming extracellular ribonucleoprotein complexes. In agreement with previous studies, which determined import preference of long dsRNA (Bolognesi et al., 2012; McEwan et al., 2012; Saleh et al., 2006) in *C. elegans* and *Drosophila*, we found that the hemolymph dsRNA-protein complex is comprised of long and mostly non-processed dsRNA (Figure 1B). These findings led us to propose potential parallel complementary functions of the extracellular dsRNA-protein complex involving stabilization, translocation, and introduction of the circulatory RNAi signal to recipient cells and tissues in a specific and/or non-specific manner. Yet, investigating such potential roles would require the identification and characterization of the RNA-binding hemolymph proteins in future studies. Northern blot analysis of dsRNA-GFP in worker and royal jellies indicated that RNA secreted by the feeding gland cells had undergone partial processing or degradation (Figure 1C), therefore, suggesting that once systemic hemolymph dsRNA is taken up by cells, it is engaged with RNA processing (e.g., Dicer) or degrading factors.

Suspected prolonged viral disease resistance in field hives fed on dsRNA homologous to a bee virus (IAPV) (Hunter et al., 2010) suggested long-term effect of RNAi in treated colonies 3–4 months after the last dsRNA treatment. RNAi maintenance via dsRNA amplification, driven by the viral RdRp and/or endog-

enous expression (Goic et al., 2013; Maori et al., 2007; Tassetto et al., 2017), can explain silencing persistence in an individual bee. Nevertheless, it is unlikely to explain long-term protection at the colony level since the honey bee's lifespan during the summer is circa six weeks. Worker larvae are fed exclusively jelly for three days and then predominantly jelly, honey, and pollen mix. Therefore, the presence of dsRNA-GFP in jelly demonstrated jelly-secretion mediated RNA transfer to next generations (Figure 1C). Our experiments show that horizontal RNA transfer is the main route to share and spread RNA, at least in a dsRNA form, among the bee population in the hive. However, the data cannot rule out additional vertical transmission of RNA from queen to eggs. Ingestion of dsRNA-supplemented jelly under natural or *in vitro* conditions has been reported to confer efficient endogenous and exogenous gene silencing in honey bee larvae and newly emerged adults (Desai et al., 2012; Guo et al., 2013; Nunes and Simões, 2009; Zhu et al., 2017). Here, we show that dsRNA that is secreted into the jelly and consumed by larvae is also biologically potent and can induce a long-lasting RNAi that persists until adulthood (Figure 2F). Therefore, an interpretation of our results leads us to conclude that RNA transfer to larvae could potentially prime anti-viral RNAi and explain the suspected long term protection against viral disease in infected hives fed on IAPV-dsRNA (Hunter et al., 2010).

RNAi has been established in insects, including honey bees, as a key immune response against viruses (Gammon and Mello, 2015; Maori et al., 2009; Tassetto et al., 2017). During infection, local RNAi develops into a systemic signal to control viral spread and propagation in distant cells and tissues. Our data indicate that systemic RNAi signal is not limited to the infected bee, but spreads beyond to other individuals in the hive. Diverse fragments of bacterial, fungal, and viral RNA naturally occur in both jellies, representing 25% and 16.75% of total worker and royal jelly RNA, respectively (Figures 3B, 4A, and 4B). The presence of both sense and anti-sense viral sequences in the jellies suggests secretion of viral RNA originated from cells. Additionally, potential Dicer substrates seem to be common among natural viral jelly RNA (Figures 4E, 4F, and S2), supporting transfer of naturally occurring RNAi triggers to the larvae. We previously demonstrated cross species bi-directional RNAi transfer between the honey bee and *Varroa* mite, which has been applied for *Varroa* control (Garbian et al., 2012; Sela et al., 2015). Thus, in addition to individual defense, transmissible RNA could elicit a colony-level protective outcome. Relative to other insects, the honey bee's genome encodes a reduced number and variety of immune gene families. It has been therefore suggested that the bees' behavioral group defense provides a complementary level of immunity, compensating for the reduction of immune genes (Evans et al., 2006). We hypothesize another form of collective defense: social immunity that is engendered through transfer of pathogen-related RNA among members in the hive. Natural RNA-driven social immunity requires further evidence in future research to elucidate the physiological and biochemical responses of recipient larvae to ingested jelly RNA, including engagement with RNAi factors and processing into small RNAs.

It is generally agreed that RNAi evolved as a defense mechanism against selfish nucleic acids and further diversified to regulate endogenous gene expression. The presence of differential

naturally occurring RNA among worker and royal jellies points toward a potential effect of transmissible RNA on genome function in recipient bees. Indeed, supplementing jelly with endogenous or exogenous miRNAs that are naturally enriched in worker jelly affected gene expression as well as developmental and morphological characters of newly emerged workers and queens (Guo et al., 2013; Zhu et al., 2017). Here, we showed that worker and royal jellies contain substantial proportions of putative honey bee dsRNA (Figures 3E–G), presumably derived from bidirectional transcription (Pelechano and Steinmetz, 2013). We speculate that bee-to-larva RNA transfer could also play a role in epigenetic dynamics among honey bees. A general involvement of epigenetics in the phenotypic plasticity of female bees has been demonstrated (Kucharski et al., 2008; Lyko et al., 2010; Spannhoff et al., 2011). Nonetheless, it is still not understood how caste-specific epigenetic marking is directed. Continuous uptake of regulatory jelly RNA could contribute toward a specific gene-expression profile of a genome with a potential to differentiate into two castes; hence, shifting toward an emergence of worker or queen. Making of a queen is a multilevel process and presumably there are numerous factors interplaying one with the other. Further research should molecularly determine the impact of jelly RNA and its relation to other identified players, such as Royalactin (Kamakura, 2011).

The presented mechanistic experiments with artificial RNA and the occurrence of natural RNA populations in the jellies indicated not only an RNA share among bees but also its ability to persist in an external non-sterile environment. It has been reported that royal jelly contains bactericide components (Romanelli et al., 2011). Although inhibition of microbial growth could contribute to the stability of RNAs in the jelly, it cannot solely protect against environmentally distributed nucleases and physical degradation. Moreover, after ingestion, jelly RNAs need to be further stabilized in the digestive system of the larva and adult queen, which harbors a diverse microbial population (Kwong and Moran, 2016). This raises the question of how does the jelly support environmental persistence and activity of RNA (Maori et al., 2019)?

## STAR★METHODS

Detailed methods are provided in the online version of this paper and include the following:

- **KEY RESOURCES TABLE**
- **CONTACT FOR REAGENT AND RESOURCE SHARING**
- **EXPERIMENTAL MODEL AND SUBJECT DETAILS**
  - Reproductive mini hive system
- **METHOD DETAILS**
  - dsRNA synthesis
  - Molecular procedures
  - Hemolymph extraction from bees
  - Detection of dsRNA-GFP in royal jelly
  - Detection of dsRNA-GFP in worker jelly
  - Horizontal RNA transfer in the hive
  - Combs transfer experiment
  - Queens swap experiment
  - Vitellogenin silencing by horizontal transfer of dsRNA-Vg

- Real-time RT-PCR
- Sequencing of full length RNA from worker and royal jelly

- **QUANTIFICATION AND STATISTICAL ANALYSIS**

- Real-time RT-PCR statistics
- Reads trimming and QC
- Alignment of royal and jelly samples to the genome of *A. mellifera*
- RNA size analysis
- Comparative RNA size analysis
- Double-stranded honey bee RNA screen
- Comparative metagenomics of sequenced RNA populations
- Characterization of jelly RNA corresponding to the honey bee genome
- Enrichment analysis of protein-coding jelly RNAs
- Detection of viral RNAs
- Abundance comparison of viral RNAs between royal and worker jellies

- **DATA AND SOFTWARE AVAILABILITY**

## SUPPLEMENTAL INFORMATION

Supplemental Information can be found online at <https://doi.org/10.1016/j.celrep.2019.04.073>.

## ACKNOWLEDGMENTS

Professor Ilan Sela, who died aged 81, was Professor of Virology and Molecular Biology at the Hebrew University of Jerusalem and was regarded as one of the pioneer virologists in Israel. Ilan was a creative mind and a passionate scientist. He found joy in understanding fundamental principles in biology and reveled in their translation into real world solutions. For more than five decades, he nourished generations of students with curiosity and admiration toward science. Ilan is greatly missed. The authors thank Dr. Ed Farnell and Dr Emily Clemente from Cambridge Genomic Services for their contribution in the RNA-seq protocol development. We thank Mr. John Rayner (Springwell Apiaries, UK) for his support on bee and jelly samples. We are grateful to Prof. Eric Miska, Prof. Jonathan Heeney, and their groups, as well as to Professor Sir Peter Lachmann, Mr. David Seilly, Dr. Laurence Tiley, and Dr. Shahar Avin (Cambridge University) for inspiring discussions and advice. This work was supported by internal B. Triwaks Bee Research Center funds (HUJI no. 0356043), the Orion Foundation (HUJI no. 0368598), and Israel Science Foundation (grant no. 1456/10) to S.S. Research was also supported by Marie Curie Intra-European Fellowship For Career Development (PIEF-GA-2010-274406), Leo Baeck Scholarship, and Herchel Smith Postdoctoral Fellowship (XXACC\_AFGLTRB2) to E.M.

## AUTHOR CONTRIBUTIONS

E.M. conceptualized and supervised the study; E.M., Y.G., O.M., I.S., and S.S. designed experiments; E.M., Y.G., and H.K. performed the beehive and hemolymph experiments; O.M. performed the dsRNA-Vg experiment; E.M., Y.G., and R.M.K. performed the molecular analyses; V.K. and N.S. analyzed the sequencing data; and E.M. wrote the paper with input from all authors.

## DECLARATION OF INTERESTS

The authors declare no competing interests. E.M. is a founder, Director, and Chief Science Officer of Tropic Biosciences Ltd. Tropic Biosciences had no role in the design of the study, in collection, analysis, and interpretation of data, nor in writing the manuscript.

Received: August 15, 2018  
Revised: December 17, 2018  
Accepted: April 16, 2019  
Published: May 2, 2019

## REFERENCES

- Almeida, R., and Allshire, R.C. (2005). RNA silencing and genome regulation. *Trends Cell Biol.* *15*, 251–258.
- Bernstein, E., Caudy, A.A., Hammond, S.M., and Hannon, G.J. (2001). Role for a bidentate ribonuclease in the initiation step of RNA interference. *Nature* *409*, 363–366.
- Bioinformatics, B. (2011). FastQC: a quality control tool for high throughput sequence data (Cambridge, UK: Babraham Institute).
- Bolognesi, R., Ramaseshadri, P., Anderson, J., Bachman, P., Clinton, W., Flannagan, R., Ilagan, O., Lawrence, C., Levine, S., Moar, W., et al. (2012). Characterizing the mechanism of action of double-stranded RNA activity against western corn rootworm (*Diabrotica virgifera virgifera* LeConte). *PLoS ONE* *7*, e47534.
- Buck, A.H., Coakley, G., Simbari, F., McSorley, H.J., Quintana, J.F., Le Bihan, T., Kumar, S., Abreu-Goodger, C., Lear, M., Harcus, Y., et al. (2014). Exosomes secreted by nematode parasites transfer small RNAs to mammalian cells and modulate innate immunity. *Nat. Commun.* *5*, 5488.
- Cai, Q., Qiao, L., Wang, M., He, B., Lin, F.-M., Palmquist, J., Huang, S.D., and Jin, H. (2018). Plants send small RNAs in extracellular vesicles to fungal pathogen to silence virulence genes. *Science* *360*, 1126–1129.
- Castel, S.E., and Martienssen, R.A. (2013). RNA interference in the nucleus: roles for small RNAs in transcription, epigenetics and beyond. *Nat. Rev. Genet.* *14*, 100–112.
- Chen, Y.P., and Siede, R. (2007). Honey bee viruses. *Adv. Virus Res.* *70*, 33–80.
- Chen, Y.P., Pettis, J.S., Corona, M., Chen, W.P., Li, C.J., Spivak, M., Visscher, P.K., DeGrandi-Hoffman, G., Boncristiani, H., Zhao, Y., et al. (2014). Israeli acute paralysis virus: epidemiology, pathogenesis and implications for honey bee health. *PLoS Pathog.* *10*, e1004261.
- Desai, S.D., Eu, Y.-J., Whyard, S., and Currie, R.W. (2012). Reduction in deformed wing virus infection in larval and adult honey bees (*Apis mellifera* L.) by double-stranded RNA ingestion. *Insect Mol. Biol.* *21*, 446–455.
- Evans, J.D., Aronstein, K., Chen, Y.P., Hetru, C., Imler, J.-L., Jiang, H., Kanost, M., Thompson, G.J., Zou, Z., and Hultmark, D. (2006). Immune pathways and defence mechanisms in honey bees *Apis mellifera*. *Insect Mol. Biol.* *15*, 645–656.
- Feinberg, E.H., and Hunter, C.P. (2003). Transport of dsRNA into cells by the transmembrane protein SID-1. *Science* *301*, 1545–1547.
- Fire, A., Xu, S., Montgomery, M.K., Kostas, S.A., Driver, S.E., and Mello, C.C. (1998). Potent and specific genetic interference by double-stranded RNA in *Caenorhabditis elegans*. *Nature* *391*, 806–811.
- Gammon, D.B., and Mello, C.C. (2015). RNA interference-mediated antiviral defense in insects. *Curr. Opin. Insect Sci.* *8*, 111–120.
- Garbian, Y., Maori, E., Kalev, H., Shafir, S., and Sela, I. (2012). Bidirectional transfer of RNAi between honey bee and Varroa destructor: Varroa gene silencing reduces Varroa population. *PLoS Pathog.* *8*, e1003035.
- Goic, B., Vodovar, N., Mondotte, J.A., Monot, C., Frangeul, L., Blanc, H., Gausson, V., Vera-Otarola, J., Cristofari, G., and Saleh, M.-C. (2013). RNA-mediated interference and reverse transcription control the persistence of RNA viruses in the insect model *Drosophila*. *Nat. Immunol.* *14*, 396–403.
- Gordon, A., and Hannon, G.J. (2010). Fastx-toolkit. FASTQ/A Short-Reads Preprocessing Tools (unpublished) [http://hannonlab.%20Cshl.%20Edu/fastx\\_toolkit.5](http://hannonlab.%20Cshl.%20Edu/fastx_toolkit.5).
- Guo, X., Su, S., Skogerboe, G., Dai, S., Li, W., Li, Z., Liu, F., Ni, R., Guo, Y., Chen, S., et al. (2013). Recipe for a busy bee: microRNAs in Honey Bee caste determination. *PLoS ONE* *8*, e81661.
- Haydak, M.H. (1970). Honey Bee Nutrition. *Annu. Rev. Entomol.* *15*, 143–156.
- Hunter, W., Ellis, J., Vanengelsdorp, D., Hayes, J., Westervelt, D., Glick, E., Williams, M., Sela, I., Maori, E., Pettis, J., et al. (2010). Large-scale field application of RNAi technology reducing Israeli acute paralysis virus disease in honey bees (*Apis mellifera*, Hymenoptera: Apidae). *PLoS Pathog.* *6*, e1001160.
- Jose, A.M., and Hunter, C.P. (2007). Transport of sequence-specific RNA interference information between cells. *Annu. Rev. Genet.* *41*, 305–330.
- Jurka, J. (1998). Repeats in genomic DNA: mining and meaning. *Curr. Opin. Struct. Biol.* *8*, 333–337.
- Kamakura, M. (2011). Royalactin induces queen differentiation in honeybees. *Nature* *473*, 478–483.
- Kent, W.J. (2002). BLAT—the BLAST-like alignment tool. *Genome Res.* *12*, 656–664.
- Knip, M., Constantin, M.E., and Thordal-Christensen, H. (2014). Transkingdom cross-talk: small RNAs on the move. *PLoS Genet.* *10*, e1004602.
- Kucharski, R., Maleszka, J., Foret, S., and Maleszka, R. (2008). Nutritional control of reproductive status in honeybees via DNA methylation. *Science* *319*, 1827–1830.
- Kwong, W.K., and Moran, N.A. (2016). Gut microbial communities of social bees. *Nat. Rev. Microbiol.* *14*, 374–384.
- LeBoeuf, A.C., Waridel, P., Brent, C.S., Gonçalves, A.N., Menin, L., Ortiz, D., Riba-Grognuz, O., Koto, A., Soares, Z.G., Privman, E., et al. (2016). Oral transfer of chemical cues, growth proteins and hormones in social insects. *eLife* *5*, 5.
- Liu, X., Zhang, Y., Yan, X., and Han, R. (2010). Prevention of Chinese sacbrood virus infection in *Apis cerana* using RNA interference. *Curr. Microbiol.* *61*, 422–428.
- Lyko, F., Foret, S., Kucharski, R., Wolf, S., Falckenhayn, C., and Maleszka, R. (2010). The honey bee epigenomes: differential methylation of brain DNA in queens and workers. *PLoS Biol.* *8*, e1000506.
- Mao, Y.-B., Cai, W.-J., Wang, J.-W., Hong, G.-J., Tao, X.-Y., Wang, L.-J., Huang, Y.-P., and Chen, X.-Y. (2007). Silencing a cotton bollworm P450 monooxygenase gene by plant-mediated RNAi impairs larval tolerance of gossypol. *Nat. Biotechnol.* *25*, 1307–1313.
- Maori, E., Tanne, E., and Sela, I. (2007). Reciprocal sequence exchange between non-retrovirus and hosts leading to the appearance of new host phenotypes. *Virology* *362*, 342–349.
- Maori, E., Paldi, N., Shafir, S., Kalev, H., Tsur, E., Glick, E., and Sela, I. (2009). IAPV, a bee-affecting virus associated with Colony Collapse Disorder can be silenced by dsRNA ingestion. *Insect Mol. Biol.* *18*, 55–60.
- Maori, E., Navarro, I.C., Boncristiani, H., Seilly, D.J., Rudolph, K.L., Sapetschnig, A., Lin, C.-C., Ladbury, J.E., Evans, J.D., Heeney, J.L., et al. (2019). A Secreted RNA Binding Protein Forms RNA-Stabilizing Granules in the Honeybee Royal Jelly. *Mol. Cell* *74*, 598–608.
- Martin, M. (2011). Cutadapt removes adapter sequences from high-throughput sequencing reads. *EMBnet.journal* *17*, 10–12.
- Masood, M., Everett, C.P., Chan, S.Y., and Snow, J.W. (2016). Negligible uptake and transfer of diet-derived pollen microRNAs in adult honey bees. *RNA Biol.* *13*, 109–118.
- McEwan, D.L., Weisman, A.S., and Hunter, C.P. (2012). Uptake of extracellular double-stranded RNA by SID-2. *Mol. Cell* *47*, 746–754.
- Nunes, F.M.F., and Simões, Z.L.P. (2009). A non-invasive method for silencing gene transcription in honeybees maintained under natural conditions. *Insect Biochem. Mol. Biol.* *39*, 157–160.
- Pelechano, V., and Steinmetz, L.M. (2013). Gene regulation by antisense transcription. *Nat. Rev. Genet.* *14*, 880–893.
- Quinlan, A.R., and Hall, I.M. (2010). BEDTools: a flexible suite of utilities for comparing genomic features. *Bioinformatics* *26*, 841–842.
- Reimand, J., Arak, T., Adler, P., Kolberg, L., Reisberg, S., Peterson, H., and Vilo, J. (2016). g:Profiler—a web server for functional interpretation of gene lists (2016 update). *Nucleic Acids Res.* *44* (W1), W83–W89.
- Romanelli, A., Moggio, L., Montella, R.C., Campiglia, P., Iannaccone, M., Capuano, F., Pedone, C., and Capparelli, R. (2011). Peptides from Royal

- Jelly: studies on the antimicrobial activity of jelleins, jelleins analogs and synergy with temporins. *J. Pept. Sci.* 17, 348–352.
- Saleh, M.-C., van Rij, R.P., Hekele, A., Gillis, A., Foley, E., O'Farrell, P.H., and Andino, R. (2006). The endocytic pathway mediates cell entry of dsRNA to induce RNAi silencing. *Nat. Cell Biol.* 8, 793–802.
- Sela, I., Shafir, S., Maori, E., Garbian, Y., Ben-Chanoch, E., Yarden, G., and Kalev, H. (2015). Compositions for controlling *Varroa* mites in bees. US patent 8962584, filed April 13, 2012, and granted February 24, 2015.
- Spannhoff, A., Kim, Y.K., Raynal, N.J.-M., Gharibyan, V., Su, M.-B., Zhou, Y.-Y., Li, J., Castellano, S., Sbardella, G., Issa, J.-P.J., and Bedford, M.T. (2011). Histone deacetylase inhibitor activity in royal jelly might facilitate caste switching in bees. *EMBO Rep.* 12, 238–243.
- Tassetto, M., Kunitomi, M., and Andino, R. (2017). Circulating Immune Cells Mediate a Systemic RNAi-Based Adaptive Antiviral Response in *Drosophila*. *Cell* 169, 314–325.e13.
- Timmons, L., and Fire, A. (1998). Specific interference by ingested dsRNA. *Nature* 395, 854.
- Valadi, H., Ekström, K., Bossios, A., Sjöstrand, M., Lee, J.J., and Lötvall, J.O. (2007). Exosome-mediated transfer of mRNAs and microRNAs is a novel mechanism of genetic exchange between cells. *Nat. Cell Biol.* 9, 654–659.
- Voinnet, O., and Baulcombe, D.C. (1997). Systemic signalling in gene silencing. *Nature* 389, 553.
- Weiberg, A., Wang, M., Lin, F.-M., Zhao, H., Zhang, Z., Kaloshian, I., Huang, H.-D., and Jin, H. (2013). Fungal small RNAs suppress plant immunity by hijacking host RNA interference pathways. *Science* 342, 118–123.
- Whangbo, J.S., and Hunter, C.P. (2008). Environmental RNA interference. *Trends Genet.* 24, 297–305.
- Wicker, T., Sabot, F., Hua-Van, A., Bennetzen, J.L., Capy, P., Chalhoub, B., Flavell, A., Leroy, P., Morgante, M., Panaud, O., et al. (2007). A unified classification system for eukaryotic transposable elements. *Nat. Rev. Genet.* 8, 973–982.
- Winston, M.L. (1991). *The Biology of the Honey Bee* (Harvard University Press).
- Wright, G.A., Nicolson, S.W., and Shafir, S. (2018). Nutritional Physiology and Ecology of Honey Bees. *Annu. Rev. Entomol.* 63, 327–344.
- Yuan, J.S., Reed, A., Chen, F., and Stewart, C.N., Jr. (2006). Statistical analysis of real-time PCR data. *BMC Bioinformatics* 7, 85.
- Zhang, J., Khan, S.A., Hasse, C., Ruf, S., Heckel, D.G., and Bock, R. (2015). Pest control. Full crop protection from an insect pest by expression of long double-stranded RNAs in plastids. *Science* 347, 991–994.
- Zhu, K., Liu, M., Fu, Z., Zhou, Z., Kong, Y., Liang, H., Lin, Z., Luo, J., Zheng, H., Wan, P., et al. (2017). Plant microRNAs in larval food regulate honeybee caste development. *PLoS Genet.* 13, e1006946.
- Zotti, M., Dos Santos, E.A., Cagliari, D., Christiaens, O., Taning, C.N.T., and Smagghe, G. (2018). RNA interference technology in crop protection against arthropod pests, pathogens and nematodes. *Pest Manag. Sci.* 74, 1239–1250.

## STAR★METHODS

### KEY RESOURCES TABLE

| REAGENT or RESOURCE                                  | SOURCE                                                                                  | IDENTIFIER                                                                                                                                                                                          |
|------------------------------------------------------|-----------------------------------------------------------------------------------------|-----------------------------------------------------------------------------------------------------------------------------------------------------------------------------------------------------|
| <b>Biological Samples</b>                            |                                                                                         |                                                                                                                                                                                                     |
| Royal jelly                                          | B. Triwaks Bee Research Center, Hebrew University of Jerusalem; Springwell Apiaries, UK | n/a                                                                                                                                                                                                 |
| Worker jelly                                         | B. Triwaks Bee Research Center, Hebrew University of Jerusalem; Springwell Apiaries, UK | n/a                                                                                                                                                                                                 |
| Bee hemolymph                                        | B. Triwaks Bee Research Center, Hebrew University of Jerusalem                          | n/a                                                                                                                                                                                                 |
| <b>Chemicals, Peptides, and Recombinant Proteins</b> |                                                                                         |                                                                                                                                                                                                     |
| Polen supplement patties                             | ManLake                                                                                 | FD-374                                                                                                                                                                                              |
| <b>Critical Commercial Assays</b>                    |                                                                                         |                                                                                                                                                                                                     |
| DIG RNA Labeling Kit (SP6/T7)                        | Roche Life Science                                                                      | 11175025910                                                                                                                                                                                         |
| PCR DIG Probe Synthesis Kit                          | Roche Life Science                                                                      | 11636090910                                                                                                                                                                                         |
| Cap-Clip Tobacco Acid Pyrophosphatase                | CellScript                                                                              | C-CC15011H                                                                                                                                                                                          |
| 5x HOT FIREPol® EvaGreen® qPCR Mix Plus              | Solis Biodyne                                                                           | 08-24-00001                                                                                                                                                                                         |
| RNA 6000 Pico Chip and reagents                      | Agilent                                                                                 | 5067-1513                                                                                                                                                                                           |
| NEXTflex Small RNA-Seq Kit v3                        | Bioo Scientific                                                                         | NOVA-5132-05                                                                                                                                                                                        |
| <b>Deposited Data</b>                                |                                                                                         |                                                                                                                                                                                                     |
| RNA-seq                                              | This paper; ArrayExpress data                                                           | <a href="https://www.ebi.ac.uk/arrayexpress/experiments/E-MTAB-6557/">https://www.ebi.ac.uk/arrayexpress/experiments/E-MTAB-6557/</a>                                                               |
| Raw data                                             | This paper; Mendeley data                                                               | <a href="https://data.mendeley.com/datasets/wv4s233nx7/draft?a=21d6454c-ead9-4a13-bcd8-f6395652424c">https://data.mendeley.com/datasets/wv4s233nx7/draft?a=21d6454c-ead9-4a13-bcd8-f6395652424c</a> |
| <b>Experimental Models: Organisms/Strains</b>        |                                                                                         |                                                                                                                                                                                                     |
| Honey bee ( <i>Apis mellifera</i> )                  | B. Triwaks Bee Research Center, Hebrew University of Jerusalem                          | n/a                                                                                                                                                                                                 |
| <b>Oligonucleotides</b>                              |                                                                                         |                                                                                                                                                                                                     |
| See Table S5 of this paper                           |                                                                                         | n/a                                                                                                                                                                                                 |
| <b>Software and Algorithms</b>                       |                                                                                         |                                                                                                                                                                                                     |
| In-house scripts                                     | GitHub                                                                                  | <a href="https://doi.org/10.5281/zenodo.1302437">https://doi.org/10.5281/zenodo.1302437</a>                                                                                                         |
| JMP Statistical Software, Version 13                 | SAS Institute                                                                           | <a href="https://www.jmp.com/en_gb/home.html">https://www.jmp.com/en_gb/home.html</a>                                                                                                               |
| TREP Database, Release 16                            | Wicker et al., 2007                                                                     | <a href="http://botserv2.uzh.ch/kelldata/trep-db/">http://botserv2.uzh.ch/kelldata/trep-db/</a>                                                                                                     |
| RepBase, Version 22.04                               | Jurka, 1998                                                                             | <a href="https://www.girinst.org/repbase/">https://www.girinst.org/repbase/</a>                                                                                                                     |
| gProfiler                                            | Reimand et al., 2016                                                                    | <a href="https://biit.cs.ut.ee/gprofiler_archive2/r1760_e93_eg40/web/">https://biit.cs.ut.ee/gprofiler_archive2/r1760_e93_eg40/web/</a>                                                             |
| pairedBamToBed12                                     | Quinlan and Hall, 2010                                                                  | <a href="https://github.com/Population-Transcriptomics/pairedBamToBed12">https://github.com/Population-Transcriptomics/pairedBamToBed12</a>                                                         |
| intersectBed, bedtools version 2.17.0                | Quinlan and Hall, 2010                                                                  | <a href="https://github.com/Population-Transcriptomics/pairedBamToBed12">https://github.com/Population-Transcriptomics/pairedBamToBed12</a>                                                         |

### CONTACT FOR REAGENT AND RESOURCE SHARING

Further information and requests for resources and reagents should be directed to and will be fulfilled by the Lead Contact, Dr. Eyal Maori ([eyalmm@gmail.com](mailto:eyalmm@gmail.com)).

## EXPERIMENTAL MODEL AND SUBJECT DETAILS

### Reproductive mini hive system

Caged fertile queen bees, together with approximately 250 worker bees, were placed in mini hives (26x17x15.5 cm polystyrene) fitted with four mini-combs each. The mini hives were sealed and placed in a temperature-controlled room (28°C) for three days in which the combs were constructed and queen-workers recognition had been established. During the first three days, the bees were fed on a mixture of 33% honey and 67% sucrose powder (candy). Next, the mini hives were transferred into two net-houses separating between dsRNA treated, and untreated mini hives. The bees were free to fly within the net-houses and to forage for water from buckets. The first 14 days were an adaptation period, during which the colonies were fed on demand with candy, and pollen supplement patties (5 g each) were placed on top of the combs and replaced once a week. An established mini-colony was determined by at-least two constructed combs and egg-laying activity of the queen; only these hives were included in the experiment. During all the experiments, established colonies (two per treatment) were fed on pollen supplement patties (5 g each), and had an unlimited water supply.

## METHOD DETAILS

### dsRNA synthesis

The GFP sequence and primers as well as dsRNA synthesis procedure were described in Maori et al., 2009. *Apis mellifera* sequence that corresponds to the Vitellogenin mRNA (bases 4648-5084; NCBI accession number: NM\_001011578.1) served as a template for dsRNA-Vg transcription, and was amplified by the following primers: 5' **TAATACGACTCACTATAGGGCGAAAAGCTTATCAG AAGGTGGAAGAAAA** 3'; 5' **TAATACGACTCACTATAGGGCGACAATGTTTGTAAACGTTATGGTGGTA** 3' (T7 promoter in bold). Labeling of GFP-dsRNA was performed using a DIG RNA Labeling Kit (Roche) with a DIG-11-UTP concentration of 70  $\mu$ M per reaction.

### Molecular procedures

Cloning, transcription, RNA preparations, cDNA synthesis, RNA slot blot, Northern-blot, PCR and Proteinase K digestions were carried out according to published protocols or to the manufacturers' instructions. Northern-blot analyses for the detection of labeled-dsRNA were conducted without using a probe; a standard DIG Northern-blot protocol was modified by omitting the probe-hybridization step. Briefly, 10  $\mu$ l of pooled whole hemolymph extracts (detailed below) were electrophoresed in the Northern-blot analyses of labeled dsRNA, using native 1.2% agarose gel. Slot- and Northern-blot analyses for detection of non-labeled dsRNA were probed with a DIG-labeled PCR probe (Roche Diagnostics Indianapolis, IN, USA) of a sequence corresponding to GFP-sequence used as template for the dsRNA-GFP synthesis.

### Hemolymph extraction from bees

Young worker bees were collected from a single hive and immobilized within plastic straws. Individual bees were fed on 10  $\mu$ l 50% sucrose solution (w/w) containing DIG-labeled dsRNA-GFP in a final concentration of 50 ng/ $\mu$ l. The control group was fed on 50% sucrose solution (w/w) only. To control dsRNA spillage and cuticle contamination, the immobilized bees were fed directly to their glossa and complete uptake was monitored. Hemolymph was collected from a small incision at the level of the 3rd dorsal tergite, using a microcapillary. The hemolymph of 10 workers was pooled per sample and stored at  $-80^{\circ}$ C for later analysis.

### Detection of dsRNA-GFP in royal jelly

Treated colonies were fed daily on 10 mL of 50% sucrose solution (w/w) containing dsRNA-GFP in a final concentration of 20 ng/ $\mu$ l (200  $\mu$ g dsRNA-GFP per day), and untreated mini hives were fed daily on 10 mL of 50% sucrose solution (w/w) only. Feeding dsRNA-GFP was continued for five days and subsequently the colonies were fed only on 50% sucrose solution until the experiment's end. At the beginning of day four, the queens were removed in order for the bees to rear new queens. We waited two hours, and placed artificial queen cells containing 1<sup>st</sup>-2<sup>nd</sup> instar larvae grafted from a different untreated hive. On day 6, we carefully removed intact 3<sup>rd</sup>-4<sup>th</sup> instar larvae with a fine paintbrush and harvested royal jelly. Royal jelly was harvested from five artificial queen cells, pooled and stored at  $-80^{\circ}$ C.

### Detection of dsRNA-GFP in worker jelly

Treated colonies were fed daily on 10 mL of 50% sucrose solution (w/w) containing dsRNA-GFP in a final concentration of 20 ng/ $\mu$ l (200  $\mu$ g dsRNA-GFP per day), and untreated mini hives were fed daily on 10 mL of 50% sucrose solution (w/w) only. Feeding dsRNA-GFP was continued for eight days. On day five and eight, 4<sup>th</sup>-5<sup>th</sup> instar larvae were carefully removed from worker brood cells and checked for any physical damage. Worker jelly was collected by washing cells with nuclease free water to resuspend the low jelly quantity available. Samples were stored at  $-80^{\circ}$ C.

### Horizontal RNA transfer in the hive

Two treated colonies were fed daily on 15 mL of 50% sucrose solution (w/w) containing dsRNA-GFP in a final concentration of 20 ng/ $\mu$ l (300  $\mu$ g dsRNA-GFP per day), and two untreated mini hives were fed daily on 15 mL of 50% sucrose solution (w/w) only.

Feeding dsRNA-GFP was continued for seven days and subsequently all the colonies were fed only on 50% sucrose solution until the experiment's end. The day in which dsRNA was first introduced represents 'day-1' (Figure 2A). Samples were collected in different time points, immediately frozen in liquid nitrogen and kept at  $-80^{\circ}\text{C}$  for further analysis. Prior to RNA extraction, samples were rigorously washed with nuclease-free water.

### Combs transfer experiment

For five days, treated colonies were fed daily on 10 mL of 50% sucrose solution (w/w) containing dsRNA-GFP in a final concentration of 20 ng/ $\mu\text{l}$  (200  $\mu\text{g}$  dsRNA-GFP per day), and untreated mini hives were daily fed on 10 mL of 50% sucrose solution (w/w) only. On day six, combs containing 1<sup>st</sup> instar larvae were removed from an untreated hive and transferred either to another untreated or dsRNA-treated colony. On day ten, 5<sup>th</sup> instar worker larvae were collected, immediately frozen in liquid nitrogen and kept at  $-80^{\circ}\text{C}$  for further analysis (Figure 2C). Prior to RNA extraction, samples were rigorously washed with nuclease-free water.

### Queens swap experiment

For six days, one treated colony was fed daily on 10 mL of 50% sucrose solution (w/w) containing dsRNA-GFP in a final concentration of 20 ng/ $\mu\text{l}$  (200  $\mu\text{g}$  dsRNA-GFP per day), and three untreated mini hives were fed daily on 10 mL of 50% sucrose solution (w/w) only. On day six, the queens from both untreated and dsRNA-treated mini hives were caged, and on day seven swapped with other queens as follows: the queen taken from the dsRNA-treated colony replaced the queen of an untreated mini hive, and a queen from the untreated colony replaced a queen from another untreated mini hive (Figure 2E). To allow acclimation, the queens remained caged for a day and then they were released to lay eggs for three days. 100 eggs were collected per treatment on day ten and stored at  $-80^{\circ}\text{C}$  for further analysis.

### Vitellogenin silencing by horizontal transfer of dsRNA-Vg

Nine plastic boxes were populated each with ca. 150 workers (collected nearby open brood cells) and a piece of comb containing eggs and young larvae. The plastic boxes were placed in an incubator at  $34^{\circ}\text{C}$  with 45%–55% humidity. The boxes were divided into three groups (three boxes per treatment) and were fed daily for eight days with: i) 100  $\mu\text{g}$  dsRNA-Vg in 2ml 35% sucrose solution; ii) 100  $\mu\text{g}$  dsRNA-GFP in 2ml 35% sucrose solution; and iii) 2ml 35% sucrose solution. Bees were fed with additional 4 mL 35% sucrose solution per day, to avoid hunger. In addition, the bees were routinely fed pollen-sugar supplement to encourage larvae rearing (70% pollen and 30% sugar powder). On day eleven, all cells were sealed and the adult bees were removed. The newly emerged bees were paired for ten days. The pairs were prepared by placing together two bees from different treatments that emerged at the same day and originated from the same hive. Paired bees were fed with 35% sucrose solution and pollen-sugar supplement. On day ten, we collected workers samples from each treatment for Vitellogenin expression analysis.

### Real-time RT-PCR

qRT-PCR reactions were performed using the EvaGreen® qPCR Plus Mix kit (SOLIS BIODYNE) according to the manufacturer's instructions. The Vitellogenin mRNA was amplified using primers: 5'-CCAACTGGAACGGGACCTGC-3' and 5'-TGTAGCTGT CAGTCGGCGTGC-3'. Calmodulin was used as a control for normalization using primers: 5'-CGAGAGAGAACGGTGGACTC-3' and 5'-ATACGACACAGCCGACGAG -3'.

### Sequencing of full length RNA from worker and royal jelly

Royal jelly was collected from queen brood cells containing 3<sup>rd</sup> instar larvae, and worker jelly was collected from 5<sup>th</sup> instar worker larvae brood cells; all brood belonged to untreated healthy looking hives. The jelly samples were immediately frozen in liquid nitrogen and kept at  $-80^{\circ}\text{C}$  for further analysis. Total RNA extracted from worker and royal jellies was subjected to Tobacco Acid Pyrophosphatase (TAP) treatment using the Cap-Clip enzyme (CellScript). Modified RNA was purified again by standard Phenol/Chloroform extraction followed by Ethanol precipitation in the presence of Glycogen. The RNA pellet was taken up in 12  $\mu\text{l}$  nuclease-free water. RNA quality and quantity were verified using Agilent RNA 6000 pico chip on a Bioanalyzer 2100 instrument. Libraries construction and sequencing were provided by Cambridge Genomic Services (Cambridge University). Briefly, full-length RNA libraries were prepared using the NEXTflex small RNA-seq kit v3 (Bioo Scientific) according to the manufacturer's instructions with the following modifications; Adaptor ligation was performed at  $16^{\circ}\text{C}$  overnight (step A). The bead cleanup (step F) was performed following an amended one-sided purification protocol to retain also long fragments (no size selection protocol) as provided by the manufacturer. The final purification of the PCR product (step H1) followed also the amended protocol without size selection as provided by the manufacturer. Sequencing was performed in a NextSeq 500 instrument, in a 150 bp paired-end read run using the high output kit (300 cycle). RNA-seq data have been deposited in the ArrayExpress database at EMBL-EBI ([www.ebi.ac.uk/arrayexpress](http://www.ebi.ac.uk/arrayexpress)) under accession number: E-MTAB-6557.

## QUANTIFICATION AND STATISTICAL ANALYSIS

### Real-time RT-PCR statistics

Statistical analyses were conducted with JMP statistical software version 13 (SAS Institute, Cary, NC, USA). Statistical significance was set at  $p < 0.05$ . We present both  $\Delta\text{Ct}$  values and the more intuitively understood measure of relative quantification ( $= 2^{-\Delta\Delta\text{Ct}}$ );

to test for significant differences in relative expression of Vg in workers, one-way ANOVA was conducted on  $\Delta$ Ct values as previously described (Yuan et al., 2006). Significant differences between treatments were tested by the Tukey-Kramer (HSD) test.

### Reads trimming and QC

An in-house script utilizing cutadapt (version 1.11) (Martin, 2011), fastx\_trimmer (FASTX Toolkit 0.0.13) (Gordon and Hannon, 2010) and FastQC (version v0.10.1) (Bioinformatics, 2011) was used to trim raw fastq files. Briefly, Illumina NEXTFlex small RNA 5' and 3' adaptor sequences were trimmed from paired-end fastq sample files, while retaining sequences that were at least 23 bp long. Due to the two color method of sequencing and other technical sequencing considerations, reads that were shorter than the total number of sequencing cycles had a poly-A tail followed by a poly-G tail that were both trimmed. Then, the four random index bases were trimmed from both ends of the sequences. Next, 5' and 3' Illumina NEXTFlex small RNA adaptor sequences were trimmed anew and only sequences for which the length of both paired reads was at least 15bp long were retained. QC, performed with FastQC, revealed low quality bases at both ends of the reads. These low quality bases were trimmed using fastx\_trimmer and an additional QC run indicated that all the samples are properly trimmed. Total number of reads that passed trimming and QC per library is summarized in Table S1. All in-house scripts have been deposited in Github and can be downloaded: <https://doi.org/10.5281/zenodo.1302437>.

### Alignment of royal and jelly samples to the genome of *A. mellifera*

The genome of *A. mellifera* was downloaded from ensembl (release 32). Using in-house scripts (<https://doi.org/10.5281/zenodo.1302437>), the fastq files (R1 & R2) of each royal and worker jelly sample were converted into fasta files, which were then aligned to the *A. mellifera* genome using blat (Kent, 2002). The best hit for each R1 mapped read was matched with the best hit for its R2 mapped read. Therefore determining the final mapping of the read as well as the size of its matching RNA.

### RNA size analysis

For each royal and worker jelly sample, we computed the length of the sequenced RNA's independent of any genome alignment. That is, we used blat to align an R1 read and the reverse complement of its matching R2 read. We then calculated the length of the sequence the two reads span from the 5' of R1 to the 3' of R2. The size of reads that did not overlap is indicated as being greater than the length of the longer between the R1 and R2 reads (e.g., > 38 where 38 is the length in bp of the longer read). Using the described method, we managed to map the size of approximately 98.5% of all the reads in each of the samples.

### Comparative RNA size analysis

To compare the size distributions of RNA in royal jelly and worker jelly samples, we computed a histogram of all RNA sizes present in the jellies and calculated the log of Reads Per Million, hereof denoted as RPM, using the following formula:

$$\log(RPM_i) = \log\left(\left(\frac{|size_i|}{\sum_{i=15}^{300} |size_i|}\right) * 10^6\right), \text{ where } |size_i| = \# \text{ of RNA's of size } i \quad (1)$$

To compute the log(RPM) of royal and worker jelly samples in general, we calculated the average number of RNA's in each size group for all royal / worker jelly samples, that is  $\overline{|size_i|}$ , and used it to calculate the general royal / worker log(RPM) value using the following formula:

$$\log(RPM_i) = \log\left(\left(\frac{\overline{|size_i|}}{\sum_{i=15}^{300} \overline{|size_i|}}\right) * 10^6\right) \quad (2)$$

where  $\overline{|size_i|}$  = average # of RNA's of size *i* in royal or worker jelly samples

### Double-stranded honey bee RNA screen

Reads that mapped to the *Apis mellifera* genome were analyzed for the occurrence of putative honey bee dsRNA. Mapped paired-end reads were extracted from bam files using pairedBamToBed12 (<https://github.com/Population-Transcriptomics/pairedBamToBed12>). Reads were separated into plus and minus strands. Subsequently, we tested for pairwise overlaps of reads on the forward and reverse strand via bedtools intersect 2.27.1 (Quinlan and Hall, 2010), where the overlap was at least 25 nt, and the overhang on either side did not exceed 100 nt. We quantified the relative count of dsRNA candidates falling on each annotated gene (normalized by their library size). We further classified unique dsRNA candidates (characterized here by unique start and end coordinates) by noting their length distribution as well as classifying the annotation of their loci. The fraction of dsRNA reads in a sample was calculated by dividing the number of mapped reads in dsRNA regions to the total number of reads.



### Comparative metagenomics of sequenced RNA populations

To identify the origin of royal and worker jelly RNAs we used *blat* (Kent, 2002) to map the RNA sequences against the genomes of *A. mellifera*, 13 viral genomes, 5243 bacterial genomes, 1038 fungi genomes and two plant genomes. The names and the sizes of the genomes are depicted in Table S1. Each of the royal and worker jelly RNA samples was mapped to the above mentioned genomes and the percentage of RNA mapped to each species was recorded as the number of RNA sequences mapped to each specie out of the total number of RNA sequences in the sample. The RNA in each sample was first searched against the bee genome and then against viral genomes, bacterial genomes, fungi genomes and finally against plant genomes. Each *blat* search was performed with the RNAs that did not match the previous genome they were searched against. That is, all the RNAs in each sample were searched against the bee genome but only RNA reads that did not match the bee genome were searched against viral genomes, only RNAs that did not match any of the viral genomes were searched against bacterial genomes etc. In order to calculate the number of RNA sequences mapped to each genome for each type of jelly (i.e., royal / worker), the data from the three royal jelly samples were treated as a single sample and the data from the three worker jelly samples were treated as a single sample. We then recorded the percentage of RNAs that were mapped to each species for the merged royal jelly samples and for the merged worker jelly samples. For individual sample analysis, we simply recorded the percentage of RNAs that were mapped to each species for each royal or worker jelly sample.

### Characterization of jelly RNA corresponding to the honey bee genome

We used the ensembl annotation file for the genome of *A. mellifera* (release 32) to characterize the jelly RNA corresponding to the honey bee genome. Using an in-house script, we converted the ensembl annotation file into a bed format file and intersected it with a bed file version of the RNAs corresponding to the honey bee genome using *intersectBed* (bedtools version 2.17.0) (Quinlan and Hall, 2010). The number of RNAs in each annotation category was then recorded, excluding matches in which the overlap between the RNA and the annotation element was shorter than 7bp. To further characterize the jellies corresponding to the honey bee genome, we performed a blast search against two transposable elements (TE) databases, the TREP database (release 16) (Wicker et al., 2007) and RepBase (version 22.04) (Jurka, 1998). The number of RNAs that mapped to each of the TE categories was then recorded from which the percentage of each TE category was calculated.

### Enrichment analysis of protein-coding jelly RNAs

Functional enrichment profiling of protein-coding RNAs in worker and royal jelly was conducted using gProfiler ([https://biit.cs.ut.ee/gprofiler\\_archive2/r1760\\_e93\\_eg40/web/](https://biit.cs.ut.ee/gprofiler_archive2/r1760_e93_eg40/web/)) with default g:GOST parameters.

### Detection of viral RNAs

To detect the presence of pathogen-related RNA, we performed a blast search (Kent, 2002) against 13 honey bee viral genomes (Table S1). That is, the RNAs of each of the six jelly samples were searched against each of the viral genomes and their genomic position, length (i.e., insert length), orientation (i.e., forward/reverse) and abundance, relative to each viral genome, were obtained (Table S4).

### Abundance comparison of viral RNAs between royal and worker jellies

To enable a comparison between the abundance of virus-related RNAs in each of the 13 viral genomes, we calculated for each jelly (i.e., royal or worker) its log(TPM), where TPM = Transcripts Per Million, using the following formula:

$$TPM_{virus_j} = \frac{X_{virus_j}}{l_{virus_j}} \left( \frac{1}{\sum_{virus_j} \frac{X_{virus_j}}{l_{virus_j}}} \right) * 10^6, \quad (3)$$

where  $X_{virus_j}$  = raw RNA counts for virus<sub>j</sub> in royal or worker jelly and  $l_{virus_j}$  = length of viral genome j (in Kb)

To analyze the size distribution of viral RNAs for each jelly type (i.e., royal / worker) or for each sample separately, we grouped the various insert lengths into nine distinct size groups: 15-19nt, 20-25nt, 26-31nt, 32-50nt, 51-75nt, 76-100nt, 101-125nt, 126-200nt and > 200nt and calculated the log(TPM) of each viral genome in each size group using the following formula:

$$TPM_{virus_j, size\_group_j} = \frac{X_{virus_j, size\_group_j}}{l_{virus_j, size\_group_j}} \left( \frac{1}{\sum_{virus_j, size\_group_k} \frac{X_{virus_j, size\_group_k}}{l_{virus_j, size\_group_k}}} \right) * 10^6, \quad (4)$$

where  $X_{virus_j, size\_group_k}$  = raw RNA counts for virus<sub>j</sub> in size\_group<sub>k</sub>

and  $l_{virus_j, size\_group_k}$  = length of viral genome j – middle of size\_group<sub>k</sub> (in Kb)

To evaluate the abundance of viral RNAs along the genome of each virus, we calculated the log(TPM) at each position along the viral genome of each virus using the following formula:

$$TPM_{virus_j, position_i} = \frac{X_{position_i}}{l_{virus_j}} \left( \frac{1}{\sum_{position_k} \frac{X_{position_k}}{l_{virus_j}}} \right) * 10^6, \quad (5)$$

where  $X_{position_i}$  = raw RNA counts at position  $i$  along the genome of virus $_j$   
and  $l_{virus_j}$  = length of viral genome  $j$  (in Kb)

### DATA AND SOFTWARE AVAILABILITY

The RNA-seq data have been deposited in the ArrayExpress database at EMBL-EBI under accession number: E-MTAB-6557. All in-house scripts have been deposited in Github and can be downloaded: <https://doi.org/10.5281/zenodo.1302437>. Other Software used in this work are all publicly available, with the links to them in the [Key Resources Table](#). The raw imaging data, including images of gels and blots, have been deposited in Mendeley Data and can be accessed: <https://data.mendeley.com/datasets/wv4s233nx7/draft?a=21d6454c-ead9-4a13-bcd8-f6395652424c>. All the rest of the data are available in the manuscript or the supplementary materials.

**Cell Reports, Volume 27**

## **Supplemental Information**

### **A Transmissible RNA Pathway in Honey Bees**

**Eyal Maori, Yael Garbian, Vered Kunik, Rita Mozes-Koch, Osnat Malka, Haim Kaley, Niv Sabath, Ilan Sela, and Sharoni Shafir**

# Figure S1 | Related to Figure 3

**A**

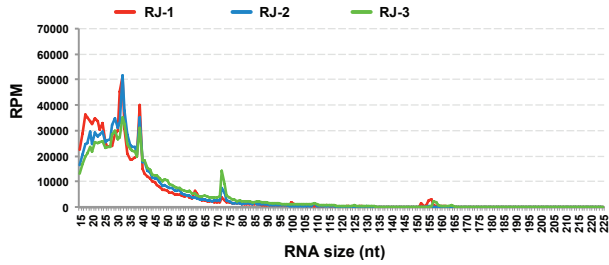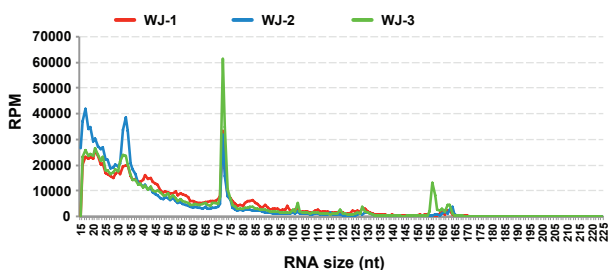

**B**

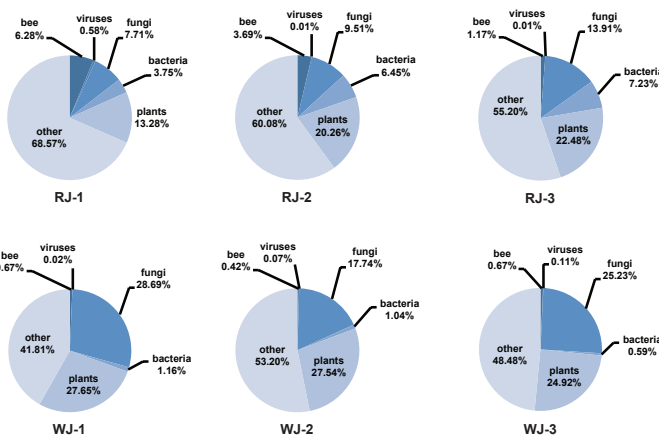

**C**

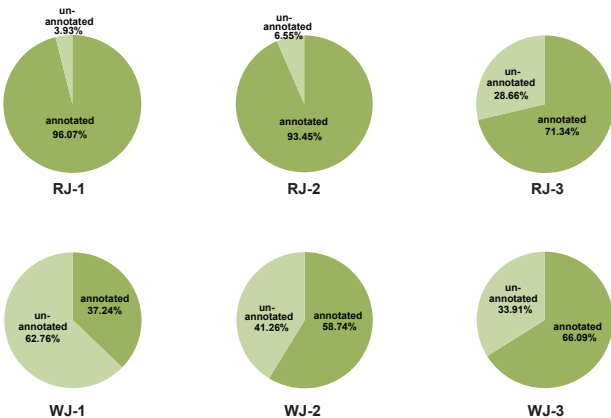

**D**

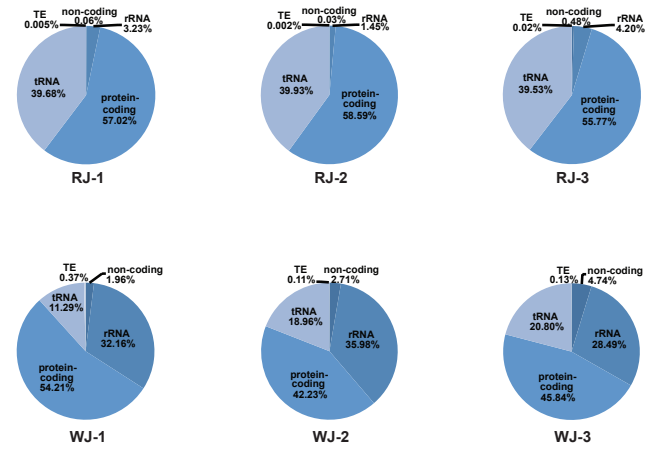

**E**

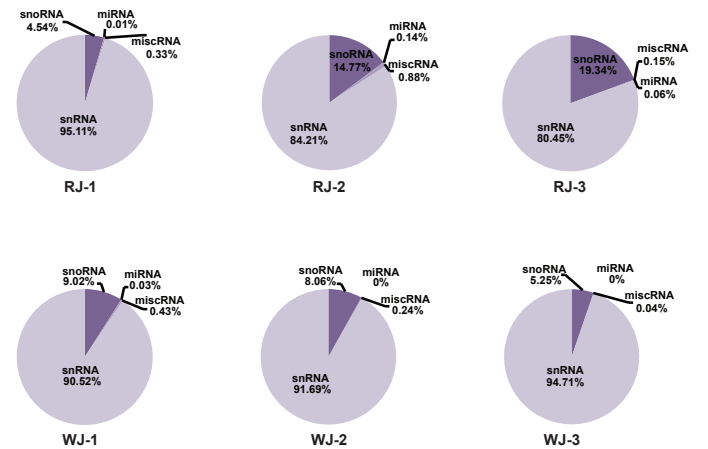

**Supplementary Figure S1, related to Figure 3.**

**A)** Size distribution of royal and worker jelly RNA. Data are presented as the normalized number of Reads Per one Million (RPM).

**B)** RNA-based metagenomic analysis in three biological replicas of royal and worker jellies.

**C)** Proportion of annotated and un-annotated honey bee RNA in three biological replicas of royal and worker jellies.

**D)** Proportion of different honey bee RNA species in three biological replicas of royal and worker jellies.

**E)** Proportion of non-coding honey bee RNA species in three biological replicas of royal and worker jellies.

# Figure S2 | Related to Figure 4

## Color Code

- 20-25 nt
- 26-31 nt
- 32-50 nt
- 51-75 nt
- 76-100 nt
- >100 nt

### A

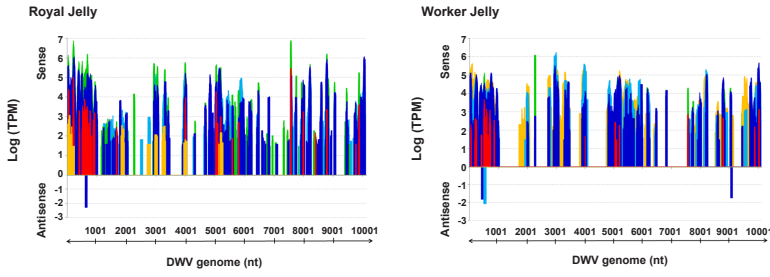

### F

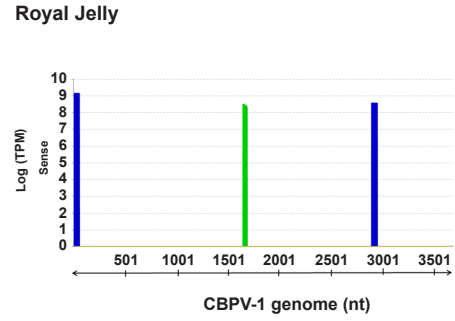

### B

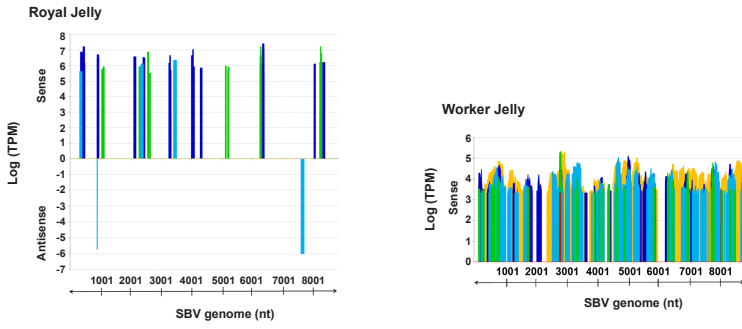

### G

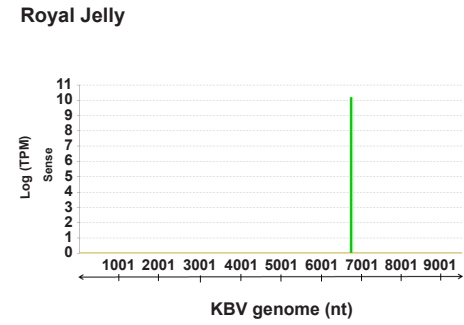

### C

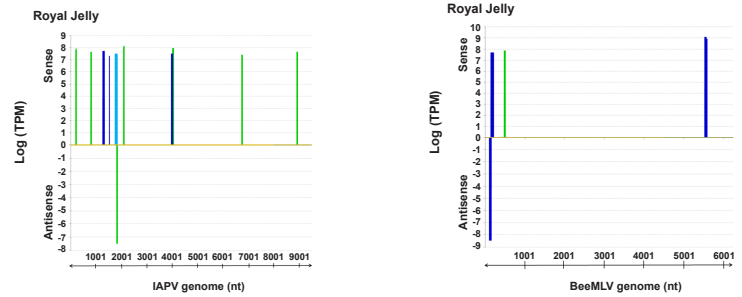

### H

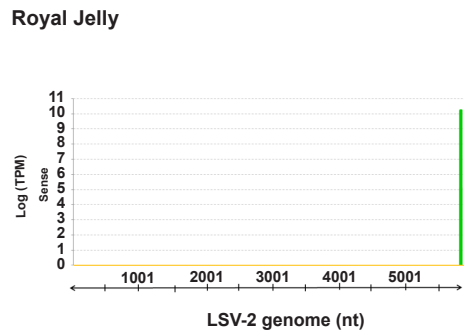

### E

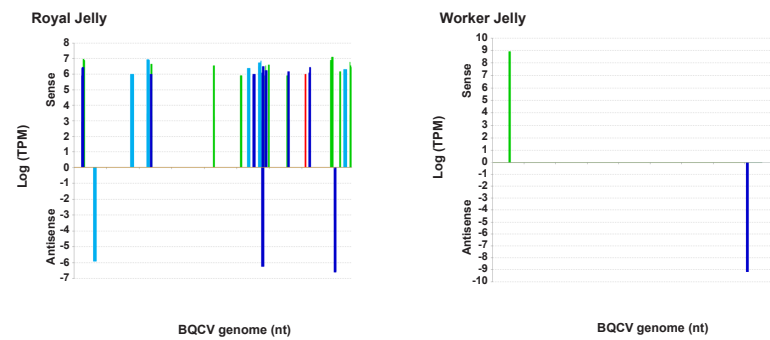

### I

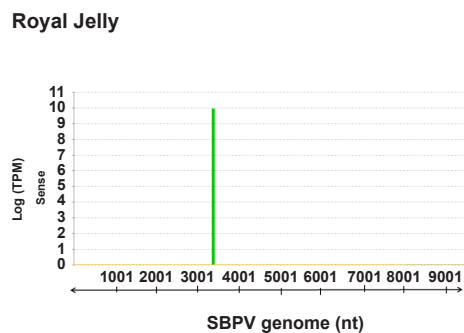

**Supplementary Figure S2, related to Figure 4.**

**A)** Genome distribution of DWV RNA fragments from royal and worker jellies.

**B)** Genome distribution of SBV RNA fragments from royal and worker jellies.

**C)** Genome distribution of IAPV RNA fragments from royal jelly.

**D)** Genome distribution of BeeMLV RNA fragments from royal jelly.

**E)** Genome distribution of BQCV RNA fragments from royal and worker jellies.

**F)** Genome distribution of CBPV1 RNA fragments from royal jelly.

**G)** Genome distribution of KBV RNA fragments from royal jelly.

**H)** Genome distribution of LSV2 RNA fragments from royal jelly.

**I)** Genome distribution of SBPV RNA fragments from royal jelly.

Three biological samples were individually sequenced per jelly; sequencing outcomes were merged and analysed. Data are presented as the number of reads normalized to log Transcripts Per Kilobase Million (TPM). Reads that correspond to the sense viral RNA strand (genome) are in positive TPM values, and reads that derived from the antisense viral RNA strand (anti-genome) are in negative TPM values. Not all viruses could be detected in both jellies. In figures S2 C-D and F-I no reads were detected in worker jelly.

**Supplementary Table S5, related to STAR Methods.**

Oligonucleotides used in this study.

| REAGENT or RESOURCE                                                                                                                   | SOURCE            | IDENTIFIER                                   |
|---------------------------------------------------------------------------------------------------------------------------------------|-------------------|----------------------------------------------|
| <b>Oligonucleotides</b>                                                                                                               |                   |                                              |
| Fwd primer – dsRNA GFP synthesis (T7 promoter in bold)<br>5'- <b>TAATACGACTCACTATAGGGCGAGCCAACACTT</b><br>GTCACTACTTTCTCTT-3'         | Maori et al, 2009 | n/a                                          |
| Rev primer – dsRNA GFP synthesis (T7 promoter in bold)<br>5'- <b>TAATACGACTCACTATAGGGCGAAGGTAATGGT</b><br>TGTCTGGTAAAAGGAC-3'         | Maori et al, 2009 | n/a                                          |
| Fwd primer – dsRNA Vitelogenin synthesis (T7 promoter in bold)<br>5'- <b>TAATACGACTCACTATAGGGCGAAAAGCTTATC</b><br>AGAAGGTGGAAGAAAA-3' | This paper        | n/a                                          |
| Rev primer – dsRNA Vitelogenin (T7 promoter in bold)<br>5'- <b>TAATACGACTCACTATAGGGCGACAATGTTTGTT</b><br>AACGTTATGGTGGTA-3'           | This paper        | n/a                                          |
| GFP DIG-labelled PCR probe                                                                                                            | This paper        | GenBank: U87625<br>(bases 254–685)           |
| dsRNA GFP                                                                                                                             | Maori et al, 2009 | GenBank: U87625<br>(bases 254–685)           |
| dsRNA Vitelogenin                                                                                                                     | This paper        | NCBI:<br>NM_001011578.1<br>(bases 4648-5084) |
| Fwd primer Vitelogenin mRNA (RT-qPCR)<br>5'-CCAAACTGGAACGGGACCTGC-3'                                                                  | This paper        | n/a                                          |
| Rev primer Vitelogenin mRNA (RT-qPCR)<br>5'-TGTAGCTGTCAGTCGGCGTGC-3'                                                                  | This paper        | n/a                                          |
| Fwd primer Calmodulin mRNA (RT-qPCR)<br>5'-CGAGAGAGAACGGTGGACTC-3'                                                                    | This paper        | n/a                                          |
| Rev primer Calmodulin mRNA (RT-qPCR)<br>5'-ATACGACACAGCCGACGAG-3'                                                                     | This paper        | n/a                                          |
